# Supplementary material for: Contribution of changes in the orexin system and energy sensors in the brain in depressive disorder - a study in an animal model
Source: PubMed Central journal article supplement (PMC10830606; doi:10.1007/s43440-023-00559-0), 2024-01-09
Supplement: 43440_2023_559_MOESM1_ESM.pdf [file 43440_2023_559_MOESM1_ESM.pdf]

# Supplementary materials

**Western blot membranes**

# BDNF

## Frontal cortex

membrane 1 and membrane 2

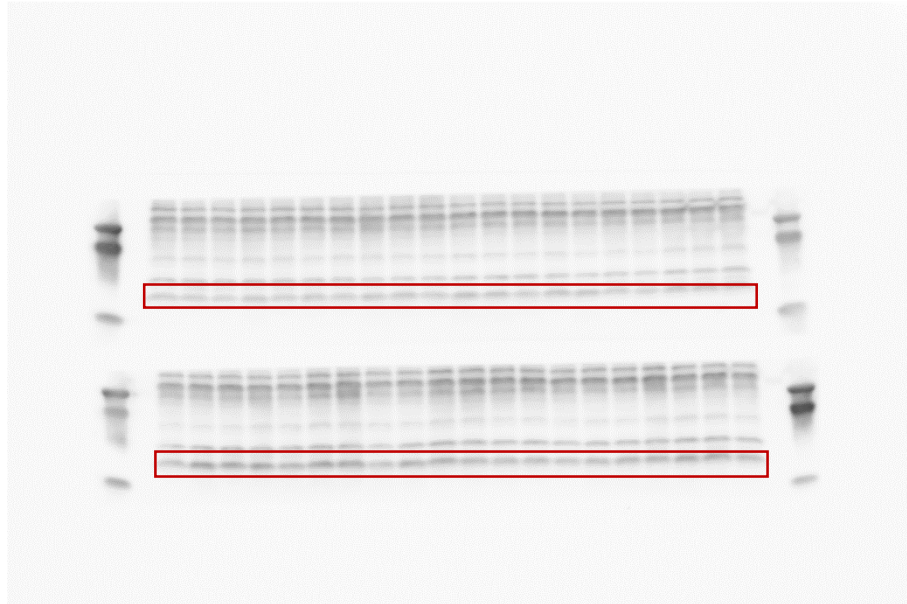

Samples from the left side - membrane 1:

*CTRL, CTRL + STRESS, DEX, DEX + STRESS, CTRL, CTRL + STRESS, DEX, DEX + STRESS.*

Samples from the left side - membrane 2:

*CTRL, CTRL + STRESS, DEX, DEX + STRESS, CTRL, CTRL + STRESS, DEX, DEX + STRESS.*

The results of the experiment are shown in Figure 5.

# $\beta$ -actin as loading control to BDNF

## Frontal cortex

membrane 1 and membrane 2

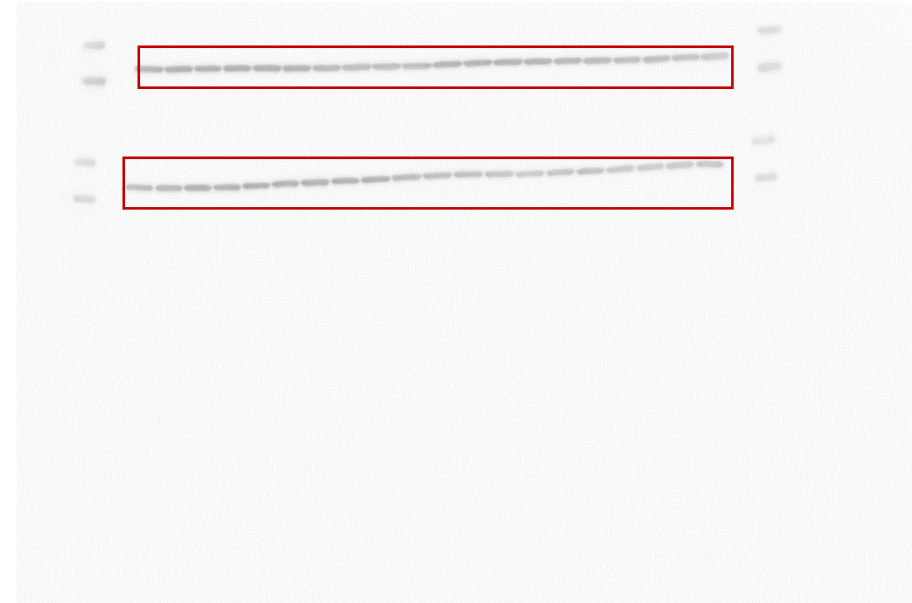

# BDNF

## Hippocampus

membrane 1 and membrane 2

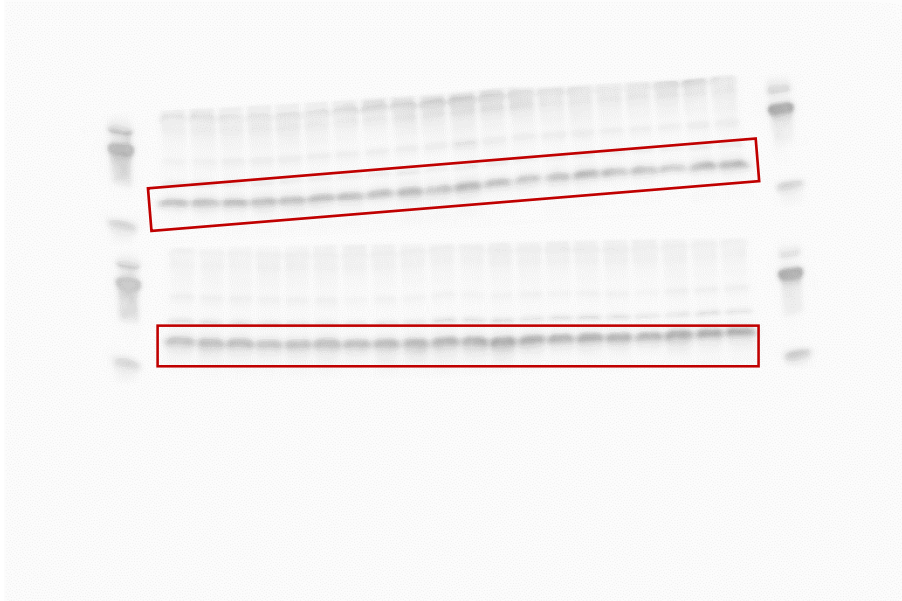

Samples from the left side - membrane 1:

*CTRL, CTRL + STRESS, DEX, DEX + STRESS, CTRL, CTRL + STRESS, DEX, DEX + STRESS.*

Samples from the left side - membrane 2:

*CTRL, CTRL + STRESS, DEX, DEX + STRESS, CTRL, CTRL + STRESS, DEX, DEX + STRESS.*

The results of the experiment are shown in Figure 5.

# $\beta$ -actin as loading control to BDNF

## Hippocampus

membrane 1 and membrane 2

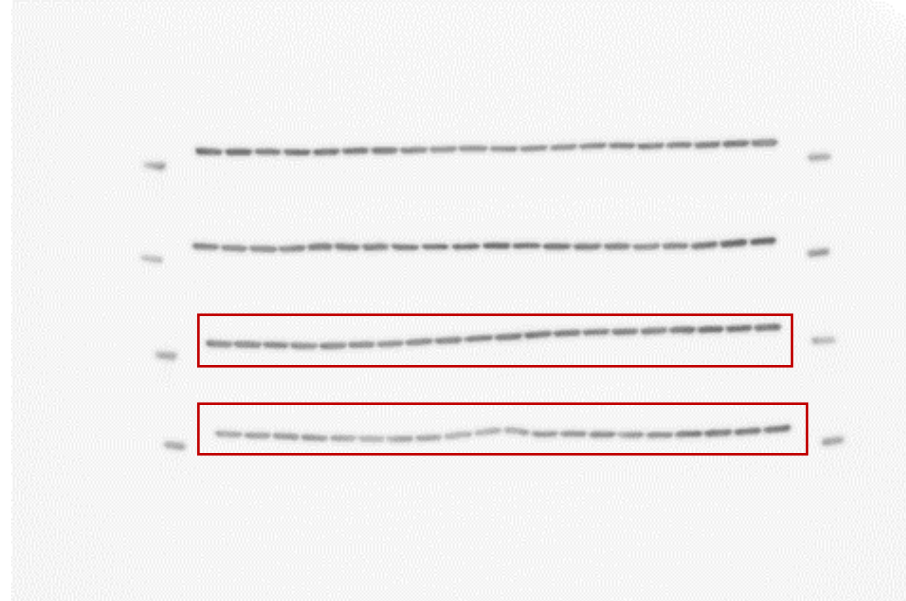

## pIGF1-R

### Frontal cortex

membrane 1 and membrane 2

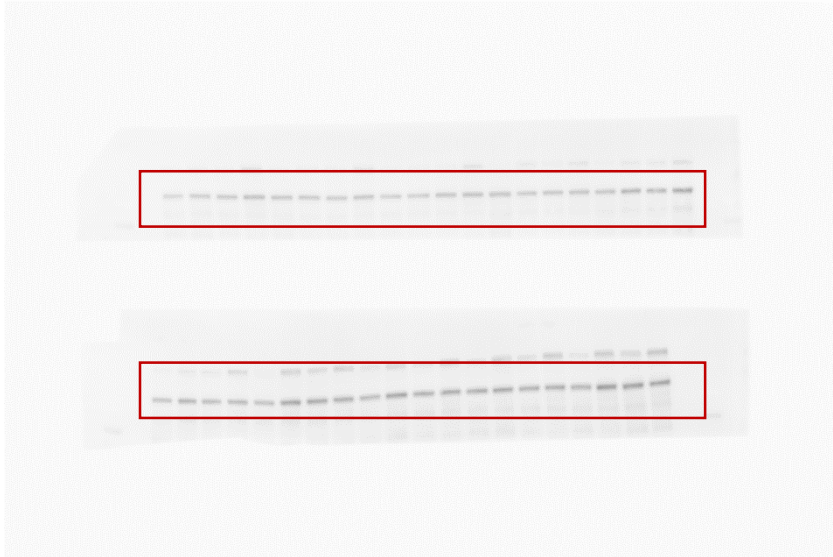

Samples from the left side - membrane 1:

*CTRL, CTRL + STRESS, DEX, DEX + STRESS, CTRL, CTRL + STRESS, DEX, DEX + STRESS,  
CTRL, CTRL + STRESS, DEX, DEX + STRESS, CTRL, CTRL + STRESS, DEX, DEX + STRESS,  
CTRL, CTRL + STRESS, DEX, DEX + STRESS.*

Samples from the left side - membrane 2:

*CTRL, CTRL + STRESS, DEX, DEX + STRESS, CTRL, CTRL + STRESS, DEX, DEX + STRESS,  
CTRL, CTRL + STRESS, DEX, DEX + STRESS, CTRL, CTRL + STRESS, DEX, DEX + STRESS,  
CTRL, CTRL + STRESS, DEX, DEX + STRESS.*

The results of the experiment are shown in Figure 6.

## $\beta$ -actin as loading control to pIGF1-R

### Frontal cortex

membrane 1 and membrane 2

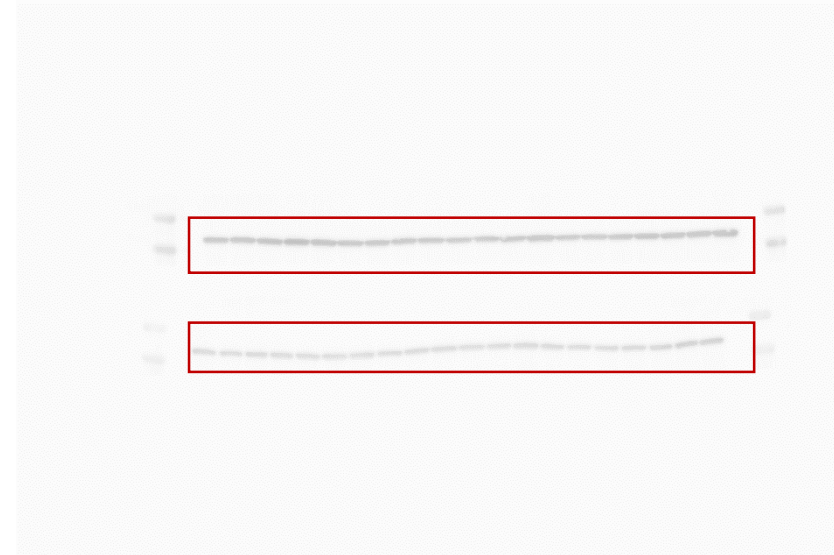

## pIGF1-R

### Hippocampus

membrane 1 and membrane 2

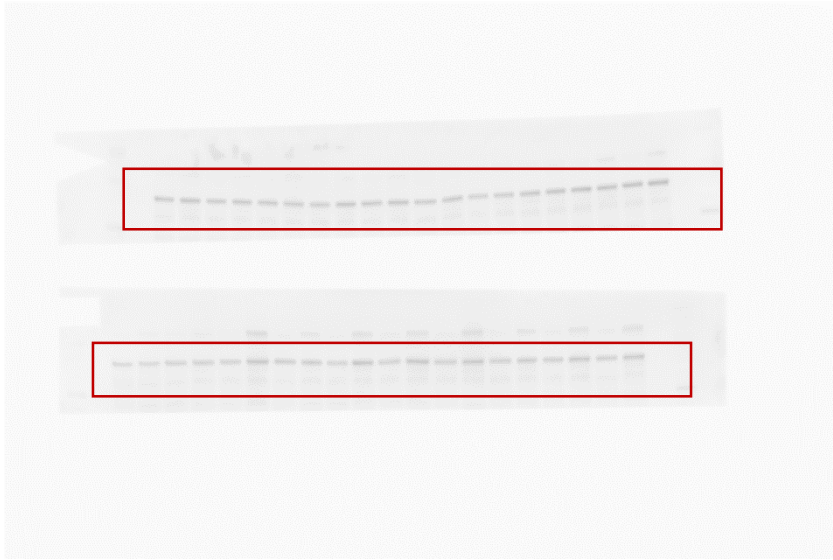

Samples from the left side - membrane 1:

*CTRL, CTRL + STRESS, DEX, DEX + STRESS, CTRL, CTRL + STRESS, DEX, DEX + STRESS,  
CTRL, CTRL + STRESS, DEX, DEX + STRESS, CTRL, CTRL + STRESS, DEX, DEX + STRESS,  
CTRL, CTRL + STRESS, DEX, DEX + STRESS.*

Samples from the left side - membrane 2:

*CTRL, CTRL + STRESS, DEX, DEX + STRESS, CTRL, CTRL + STRESS, DEX, DEX + STRESS,  
CTRL, CTRL + STRESS, DEX, DEX + STRESS, CTRL, CTRL + STRESS, DEX, DEX + STRESS,  
CTRL, CTRL + STRESS, DEX, DEX + STRESS.*

The results of the experiment are shown in Figure 6.

## $\beta$ -actin as loading control to pIGF1-R

### Hippocampus

membrane 1 and membrane 2

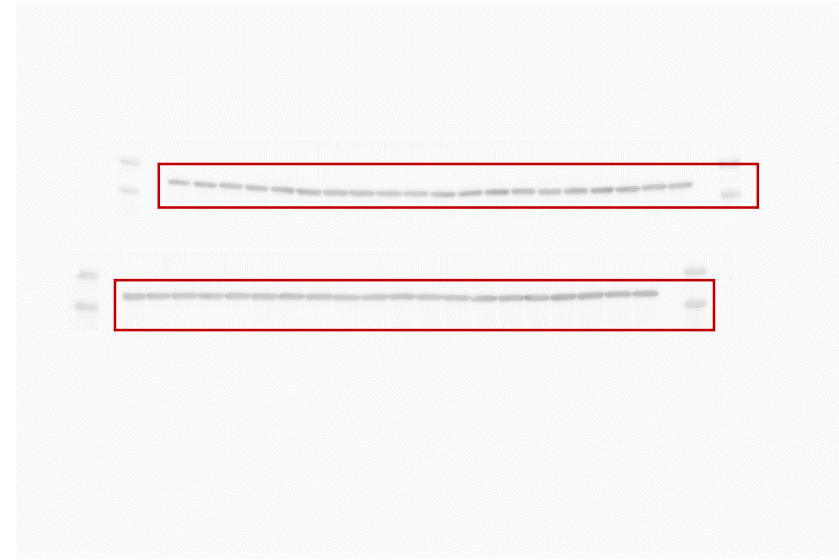

## IGF1-R

### Frontal cortex

membrane 1 and membrane 2

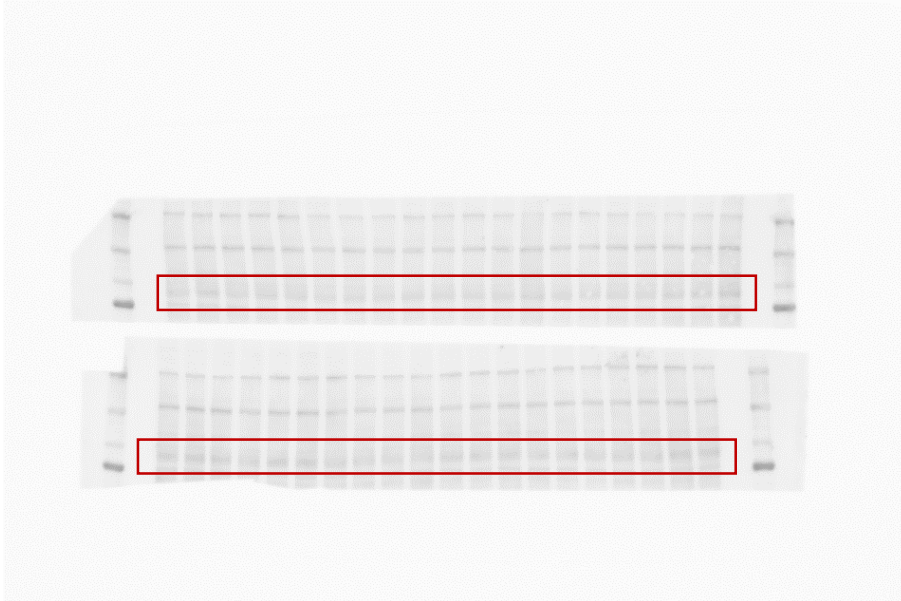

Samples from the left side - membrane 1:

*CTRL, CTRL + STRESS, DEX, DEX + STRESS, CTRL, CTRL + STRESS, DEX, DEX + STRESS, CTRL, CTRL + STRESS, DEX, DEX + STRESS, CTRL, CTRL + STRESS, DEX, DEX + STRESS.*

Samples from the left side - membrane 2:

*CTRL, CTRL + STRESS, DEX, DEX + STRESS, CTRL, CTRL + STRESS, DEX, DEX + STRESS, CTRL, CTRL + STRESS, DEX, DEX + STRESS, CTRL, CTRL + STRESS, DEX, DEX + STRESS.*

The results of the experiment are shown in Figure 6.

## $\beta$ -actin as loading control to IGF1-R

### Frontal cortex

membrane 1 and membrane 2

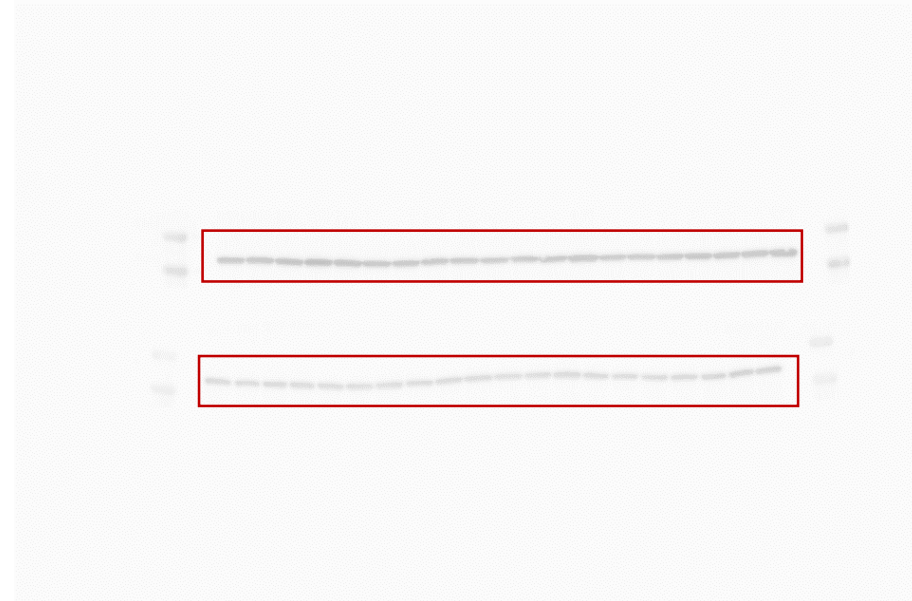

## IGF1-R

### Hippocampus

membrane 1 and membrane 2

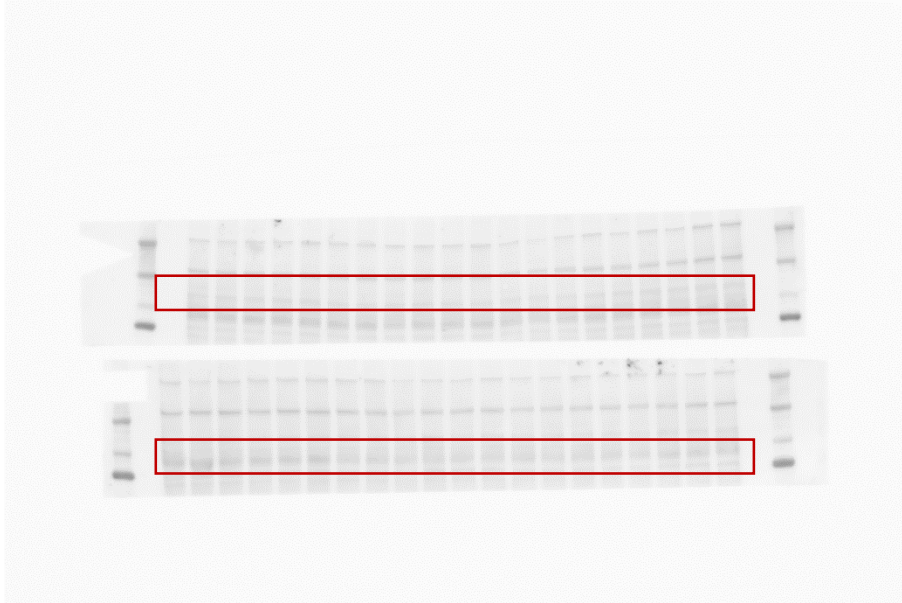

Samples from the left side - membrane 1:

*CTRL, CTRL + STRESS, DEX, DEX + STRESS, CTRL, CTRL + STRESS, DEX, DEX + STRESS,  
CTRL, CTRL + STRESS, DEX, DEX + STRESS, CTRL, CTRL + STRESS, DEX, DEX + STRESS,  
CTRL, CTRL + STRESS, DEX, DEX + STRESS.*

Samples from the left side - membrane 2:

*CTRL, CTRL + STRESS, DEX, DEX + STRESS, CTRL, CTRL + STRESS, DEX, DEX + STRESS,  
CTRL, CTRL + STRESS, DEX, DEX + STRESS, CTRL, CTRL + STRESS, DEX, DEX + STRESS,  
CTRL, CTRL + STRESS, DEX, DEX + STRESS.*

The results of the experiment are shown in Figure 6.

## $\beta$ -actin as loading control to IGF1-R

### Hippocampus

membrane 1 and membrane 2

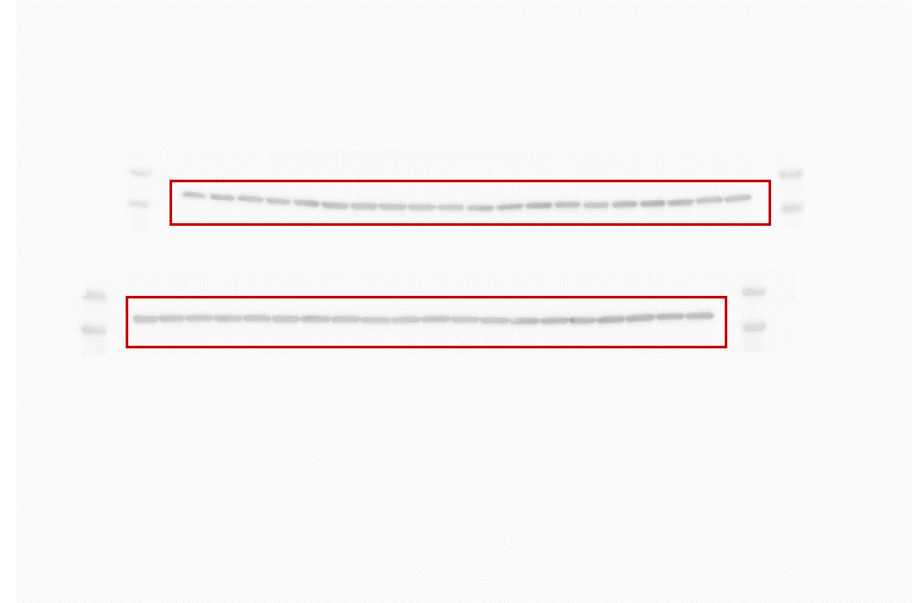

## pCREB

### Frontal cortex

membrane 1 and membrane 2

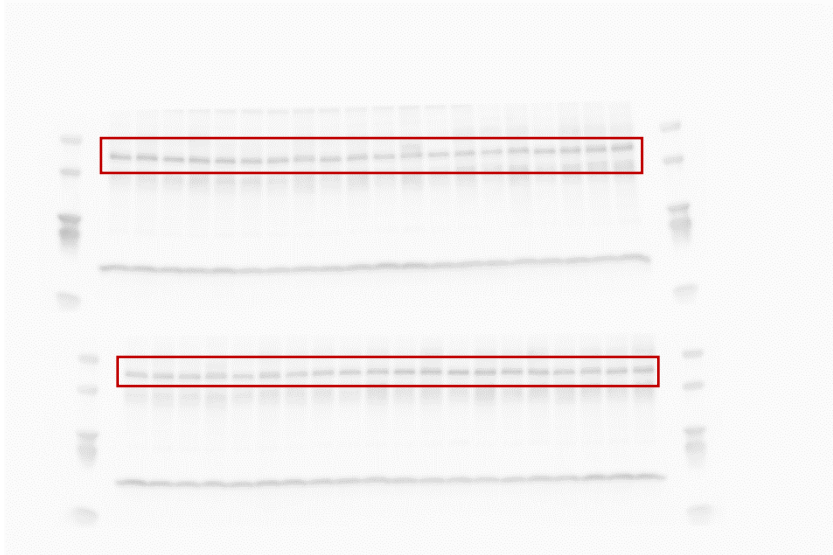

## CREB

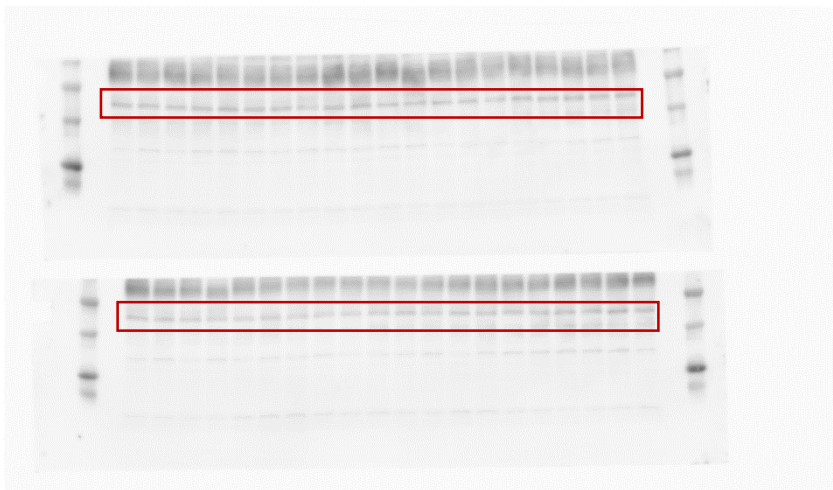

## Vinculin as loading control to pCREB i CREB

### Frontal cortex

membrane 1 and membrane 2

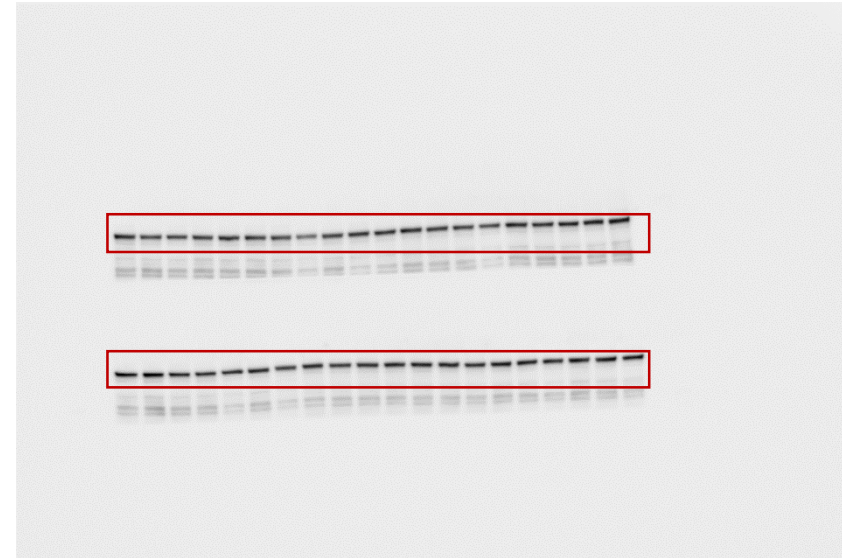

Samples from the left side - membrane 1:

*CTRL, CTRL + STRESS, DEX, DEX + STRESS, CTRL, CTRL + STRESS, DEX, DEX + STRESS.*

Samples from the left side - membrane 2:

*CTRL, CTRL + STRESS, DEX, DEX + STRESS, CTRL, CTRL + STRESS, DEX, DEX + STRESS.*

The results of the experiment are shown in Figure 7.



## pCREB

### Hippocampus

membrane 1 and membrane 2

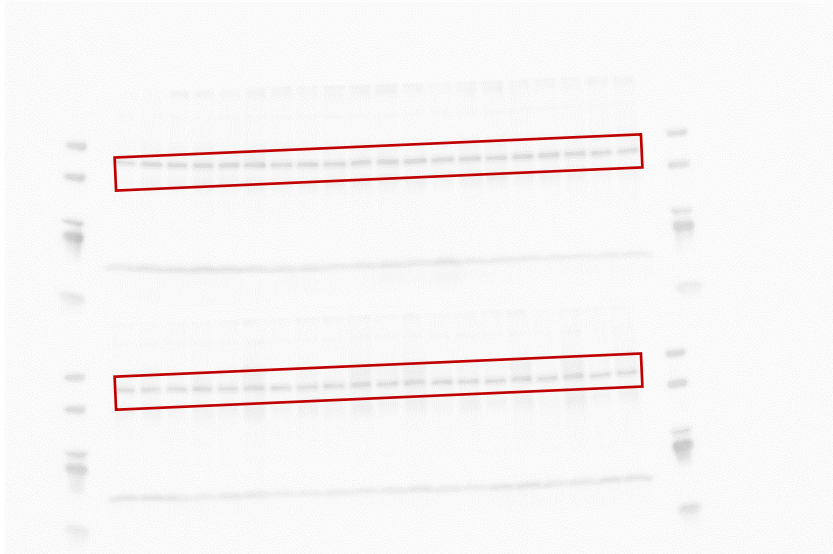

## CREB

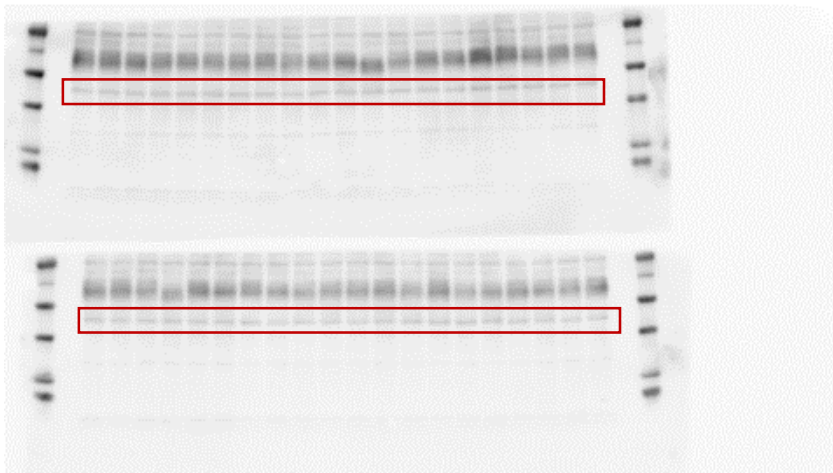

## Vinculin as loading control to pCREB i CREB

### Hippocampus

membrane 1 and membrane 2

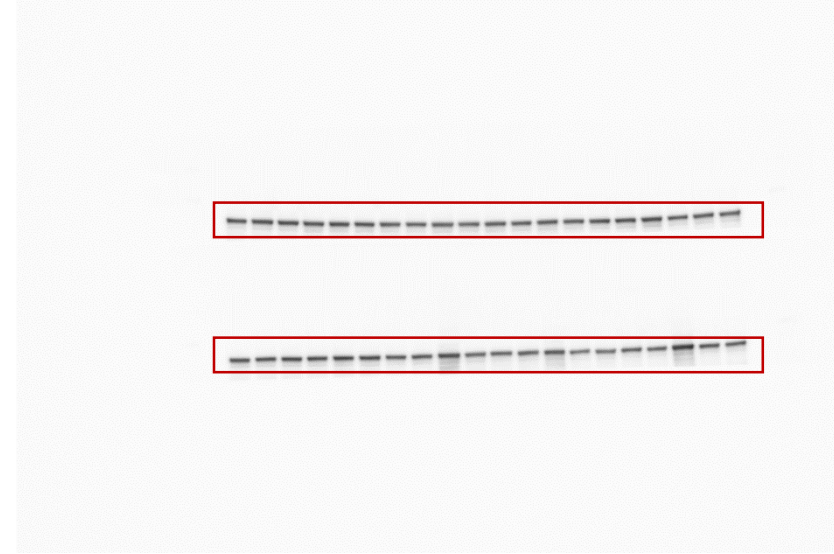

Samples from the left side - membrane 1:

*CTRL, CTRL + STRESS, DEX, DEX + STRESS, CTRL, CTRL + STRESS, DEX, DEX + STRESS.*

Samples from the left side - membrane 2:

*CTRL, CTRL + STRESS, DEX, DEX + STRESS, CTRL, CTRL + STRESS, DEX, DEX + STRESS.*

The results of the experiment are shown in Figure 7.

## GR

### Frontal cortex

membrane 1 and membrane 2

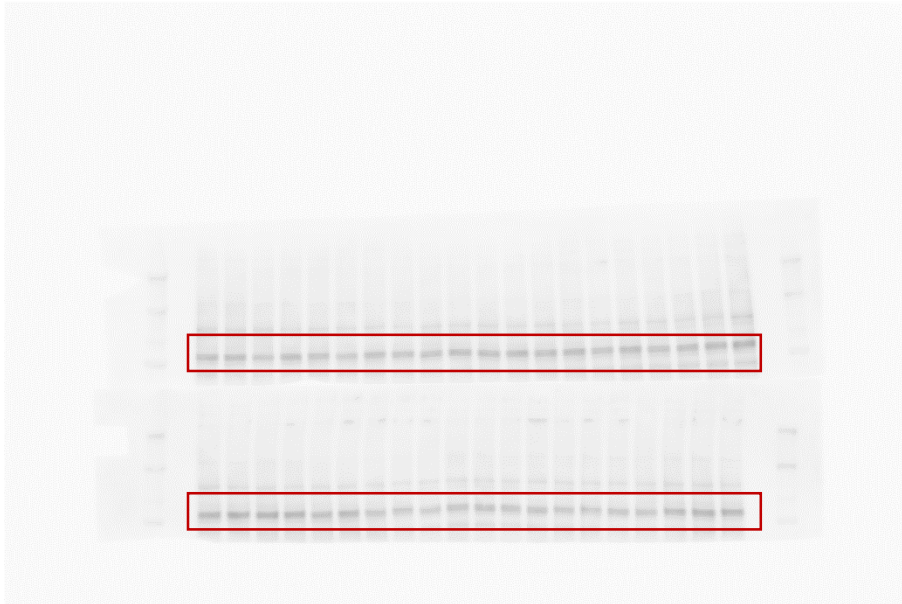

Samples from the left side - membrane 1:

*CTRL, CTRL + STRESS, DEX, DEX + STRESS, CTRL, CTRL + STRESS, DEX, DEX + STRESS, CTRL, CTRL + STRESS, DEX, DEX + STRESS, CTRL, CTRL + STRESS, DEX, DEX + STRESS.*

Samples from the left side - membrane 2:

*CTRL, CTRL + STRESS, DEX, DEX + STRESS, CTRL, CTRL + STRESS, DEX, DEX + STRESS, CTRL, CTRL + STRESS, DEX, DEX + STRESS, CTRL, CTRL + STRESS, DEX, DEX + STRESS.*

The results of the experiment are shown in Figure 8.

## $\beta$ -actin as loading control to GR

### Frontal cortex

membrane 1 and membrane 2

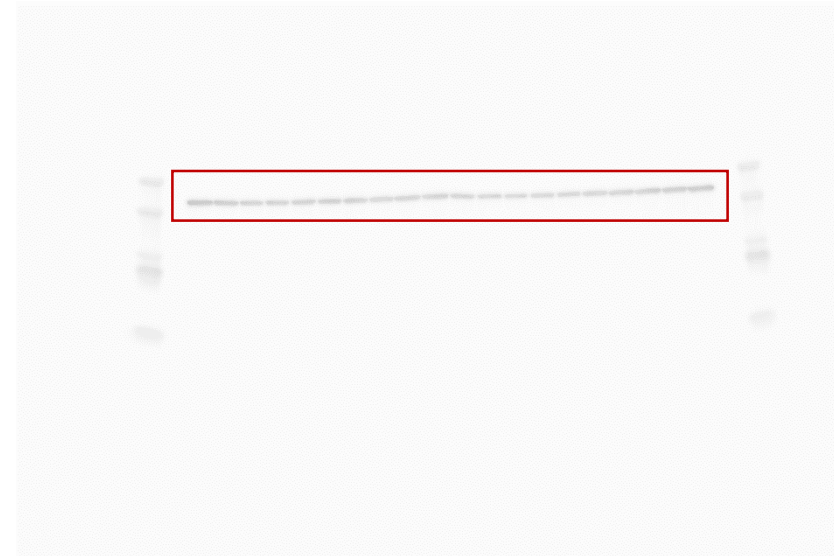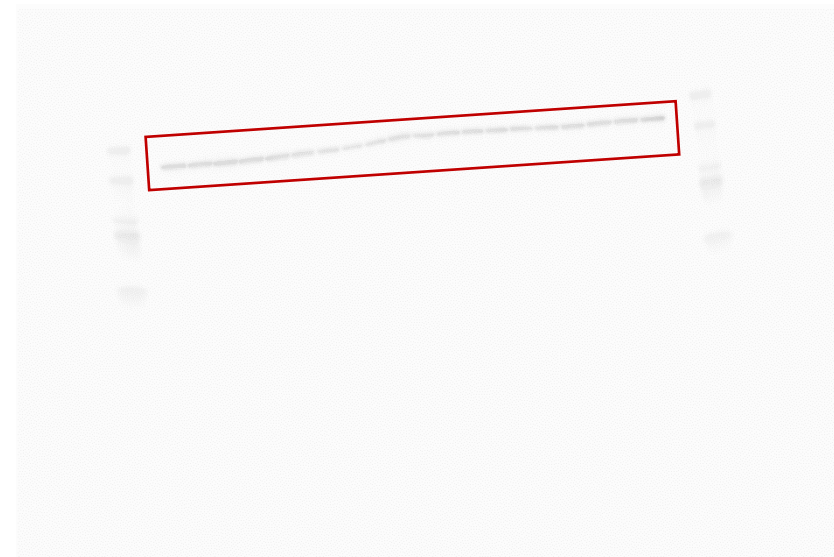

# GR

## Hippocampus

membrane 1 and membrane 2

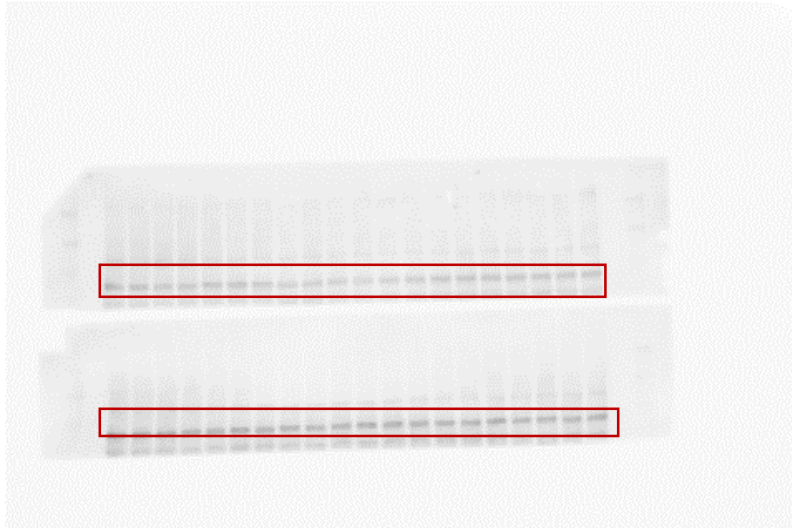

Samples from the left side - membrane 1:

*CTRL, CTRL + STRESS, DEX, DEX + STRESS, CTRL, CTRL + STRESS, DEX, DEX + STRESS.*

Samples from the left side - membrane 2:

*CTRL, CTRL + STRESS, DEX, DEX + STRESS, CTRL, CTRL + STRESS, DEX, DEX + STRESS.*

The results of the experiment are shown in Figure 8.

# $\beta$ -actin as loading control to GR

## Hippocampus

membrane 1 and membrane 2

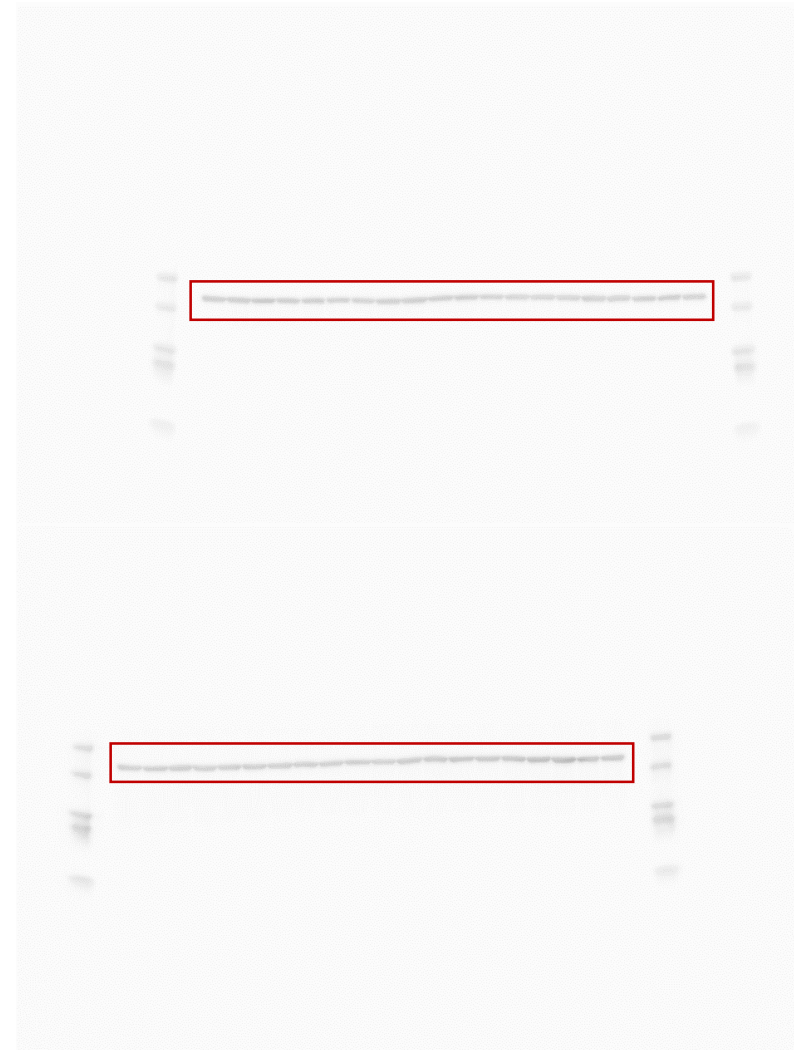

# MR

## Frontal cortex

membrane 1 and membrane 2

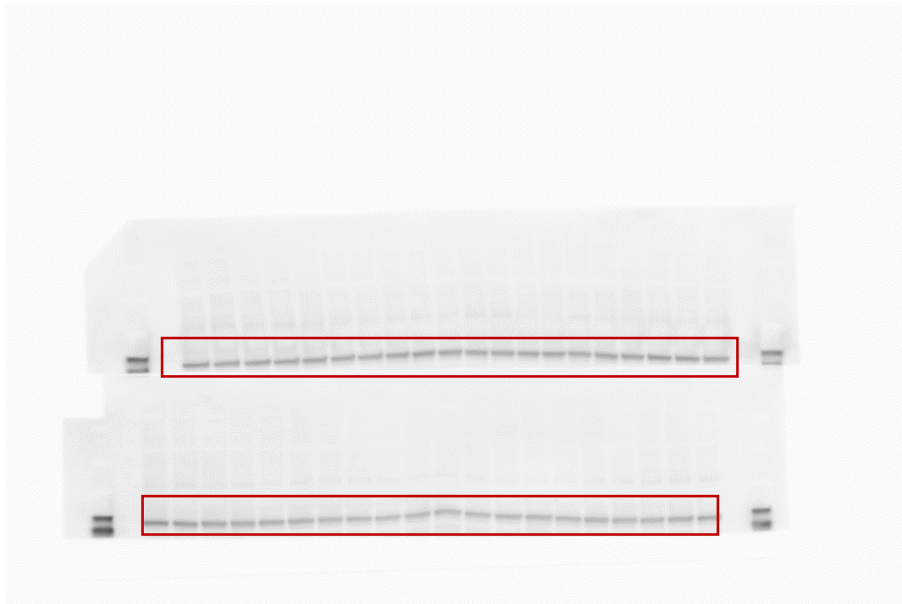

Samples from the left side - membrane 1:

*CTRL, CTRL + STRESS, DEX, DEX + STRESS, CTRL, CTRL + STRESS, DEX, DEX + STRESS, CTRL, CTRL + STRESS, DEX, DEX + STRESS, CTRL, CTRL + STRESS, DEX, DEX + STRESS.*

Samples from the left side - membrane 2:

*CTRL, CTRL + STRESS, DEX, DEX + STRESS, CTRL, CTRL + STRESS, DEX, DEX + STRESS, CTRL, CTRL + STRESS, DEX, DEX + STRESS, CTRL, CTRL + STRESS, DEX, DEX + STRESS.*

The results of the experiment are shown in Figure 8.

# $\beta$ -actin as loading control to MR

## Frontal cortex

membrane 1 and membrane 2

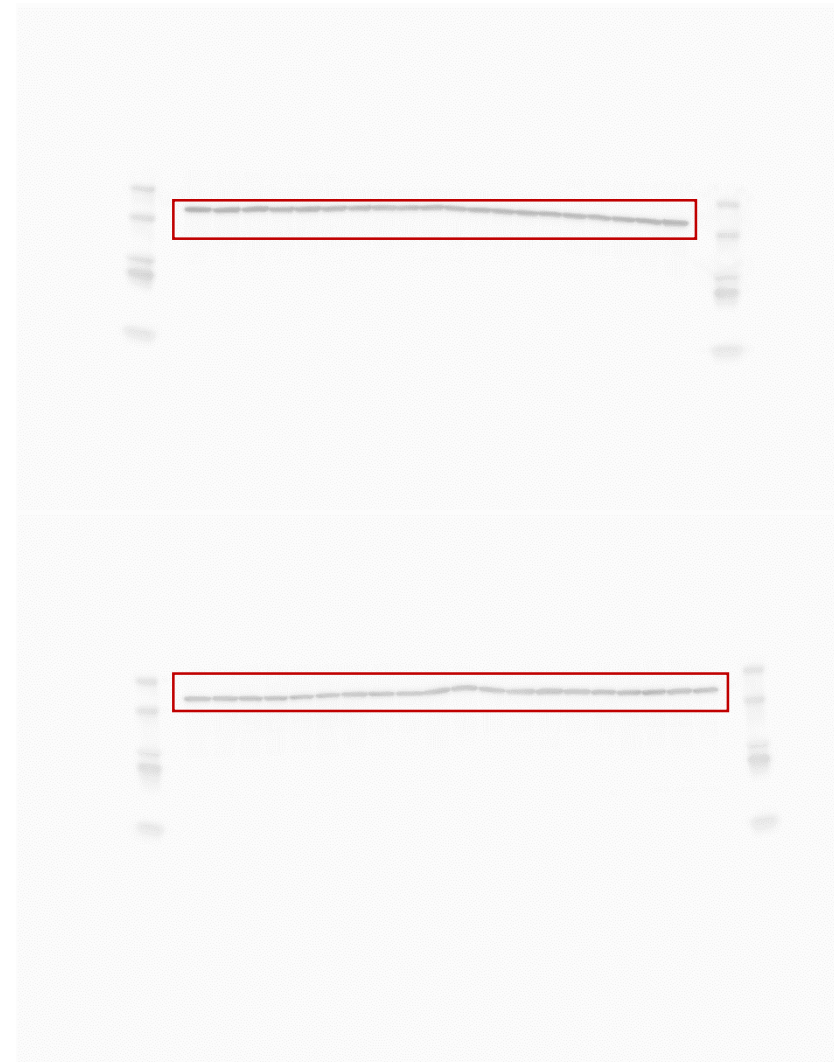

# MR

## Hippocampus

membrane 1 and membrane 2

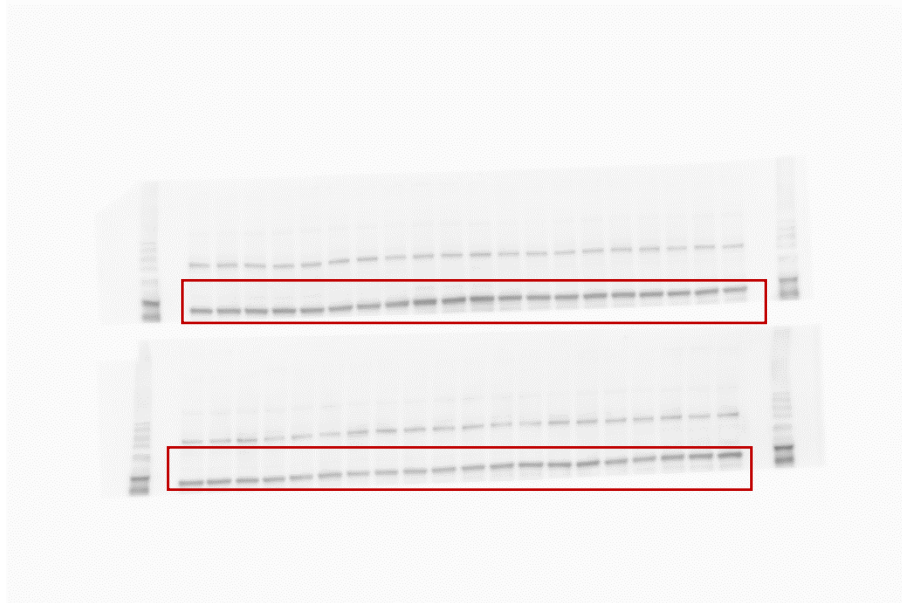

Samples from the left side - membrane 1:

*CTRL, CTRL + STRESS, DEX, DEX + STRESS, CTRL, CTRL + STRESS, DEX, DEX + STRESS.*

Samples from the left side - membrane 2:

*CTRL, CTRL + STRESS, DEX, DEX + STRESS, CTRL, CTRL + STRESS, DEX, DEX + STRESS.*

The results of the experiment are shown in Figure 8.

# $\beta$ -actin as loading control to MR

## Hippocampus

membrane 1 and membrane 2

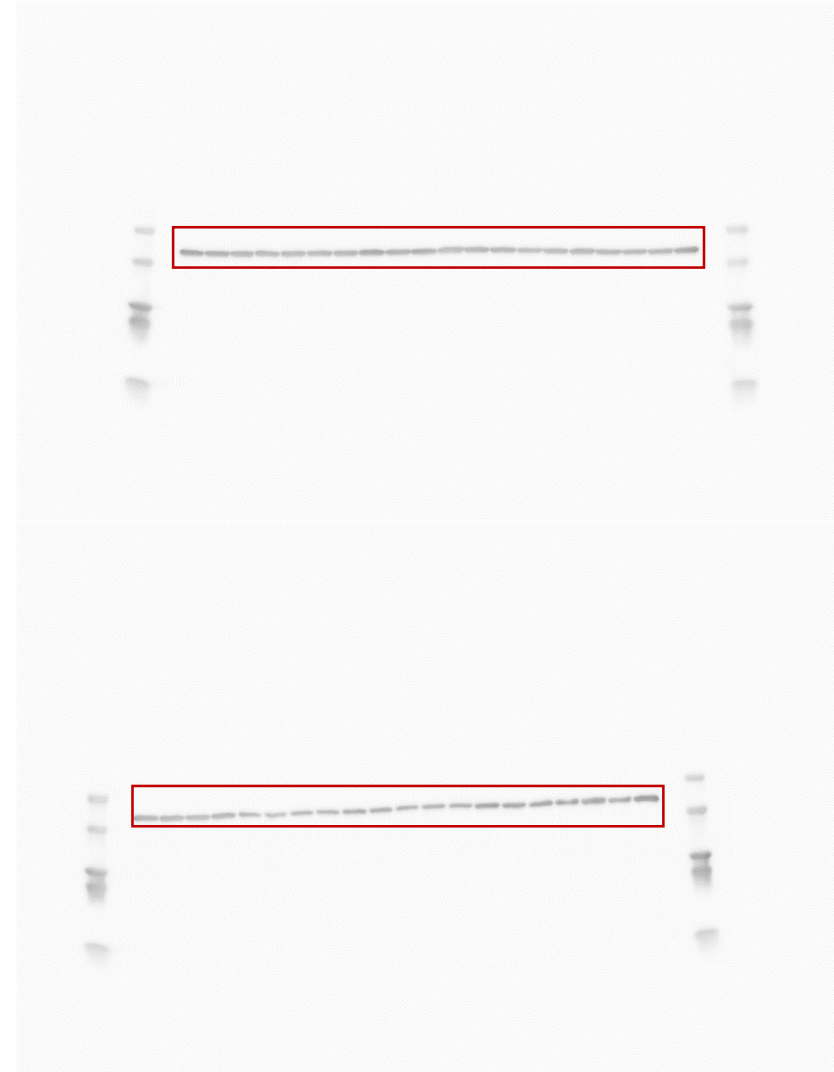

# SGK1

## Frontal cortex

membrane 1 and membrane 2

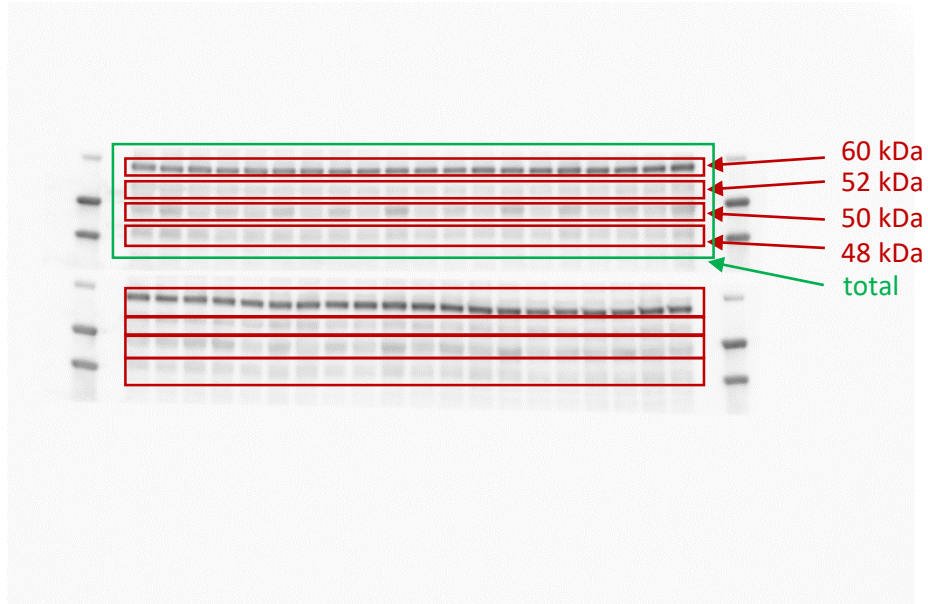

Samples from the left side - membrane 1:

*CTRL, CTRL + STRESS, DEX, DEX + STRESS, CTRL, CTRL + STRESS, DEX, DEX + STRESS.*

Samples from the left side - membrane 2:

*CTRL, CTRL + STRESS, DEX, DEX + STRESS, CTRL, CTRL + STRESS, DEX, DEX + STRESS.*

The results of the experiment are shown in Figure 9.

# Vinculin as loading control to SGK1

## Frontal cortex

membrane 1 and membrane 2

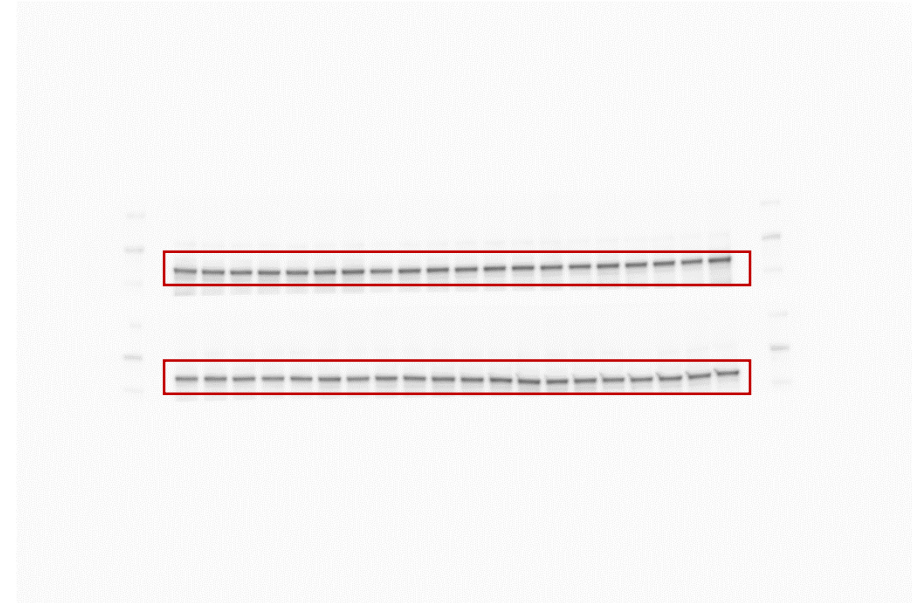

# SGK1

## Hippocampus

membrane 1 and membrane 2

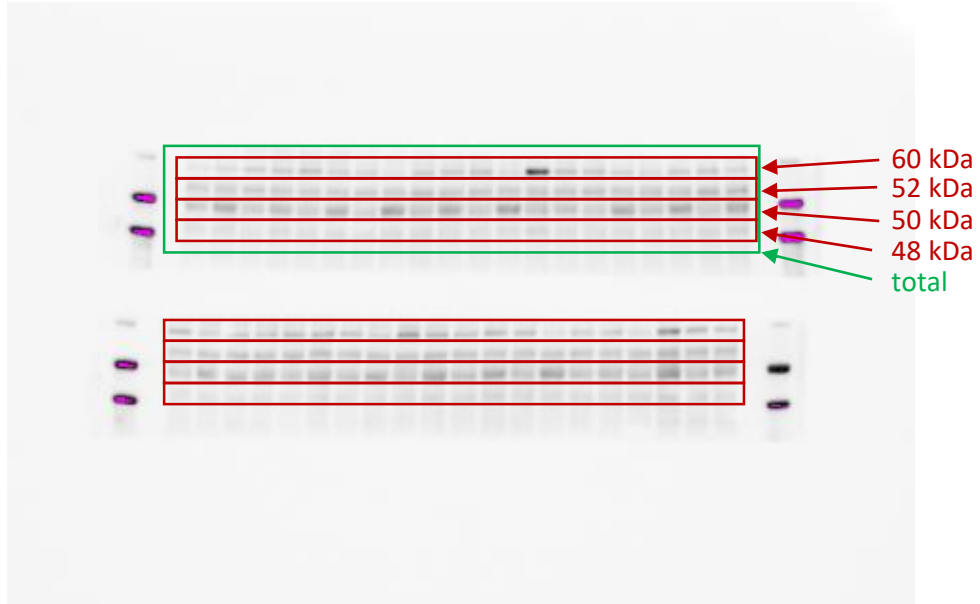

Samples from the left side - membrane 1:

*CTRL, CTRL + STRESS, DEX, DEX + STRESS, CTRL, CTRL + STRESS, DEX, DEX + STRESS.*

Samples from the left side - membrane 2:

*CTRL, CTRL + STRESS, DEX, DEX + STRESS, CTRL, CTRL + STRESS, DEX, DEX + STRESS.*

The results of the experiment are shown in Figure 9.

# Vinculin as loading control to SGK1

## Hippocampus

membrane 1 and membrane 2

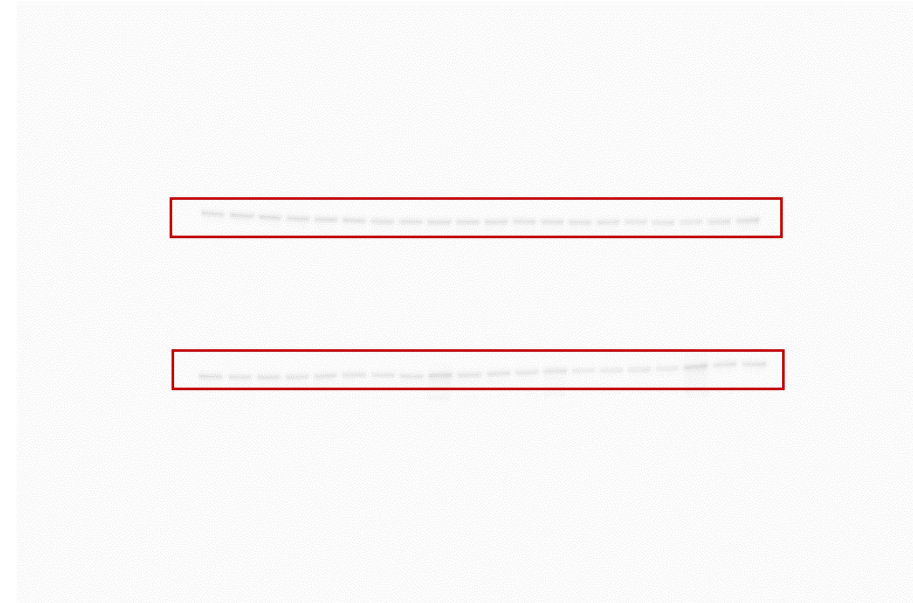

# GILZ

## Frontal cortex

membrane 1 and membrane 2

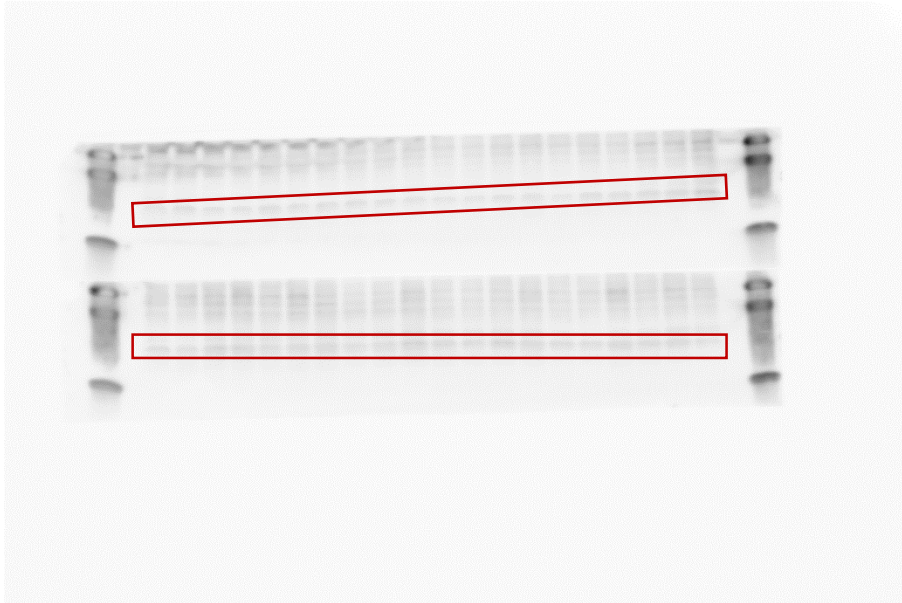

Samples from the left side - membrane 1:

*CTRL, CTRL + STRESS, DEX, DEX + STRESS, CTRL, CTRL + STRESS, DEX, DEX + STRESS.*

Samples from the left side - membrane 2:

*CTRL, CTRL + STRESS, DEX, DEX + STRESS, CTRL, CTRL + STRESS, DEX, DEX + STRESS.*

The results of the experiment are shown in Figure 9.

# Vinculin as loading control to GILZ

## Frontal cortex

membrane 1 and membrane 2

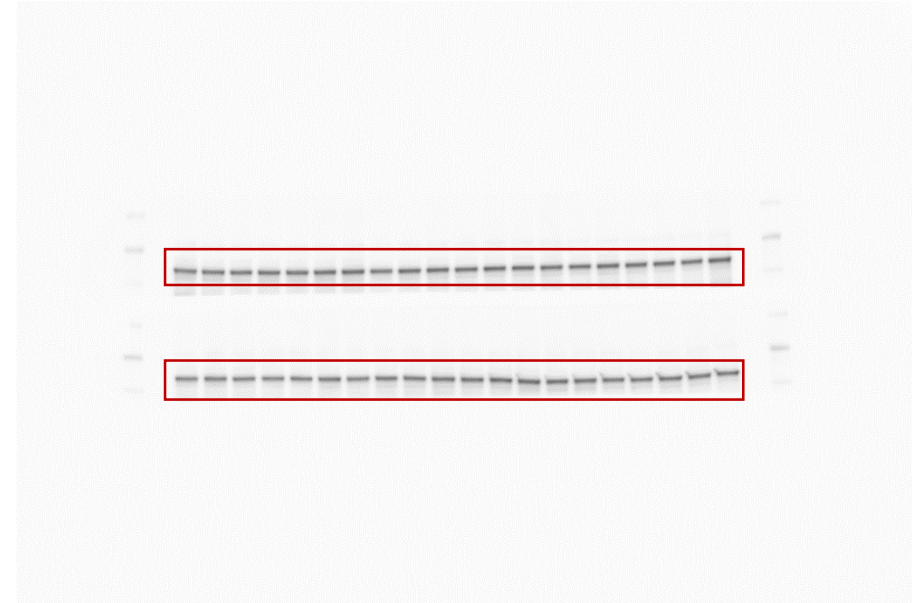



# GILZ

## Hippocampus

membrane 1 and membrane 2

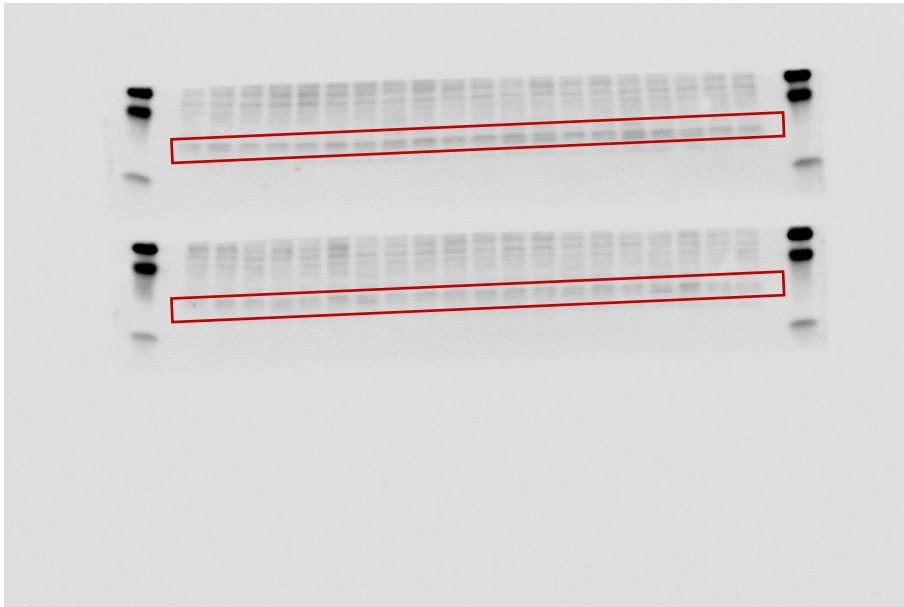

Samples from the left side - membrane 1:  
*CTRL, CTRL + STRESS, DEX, DEX + STRESS, CTRL, CTRL + STRESS, DEX, DEX + STRESS,*  
*CTRL, CTRL + STRESS, DEX, DEX + STRESS, CTRL, CTRL + STRESS, DEX, DEX + STRESS,*  
*CTRL, CTRL + STRESS, DEX, DEX + STRESS.*

Samples from the left side - membrane 2:  
*CTRL, CTRL + STRESS, DEX, DEX + STRESS, CTRL, CTRL + STRESS, DEX, DEX + STRESS,*  
*CTRL, CTRL + STRESS, DEX, DEX + STRESS, CTRL, CTRL + STRESS, DEX, DEX + STRESS,*  
*CTRL, CTRL + STRESS, DEX, DEX + STRESS.*

The results of the experiment are shown in Figure 9.

# Vinculin as loading control to GILZ

## Hippocampus

membrane 1 and membrane 2

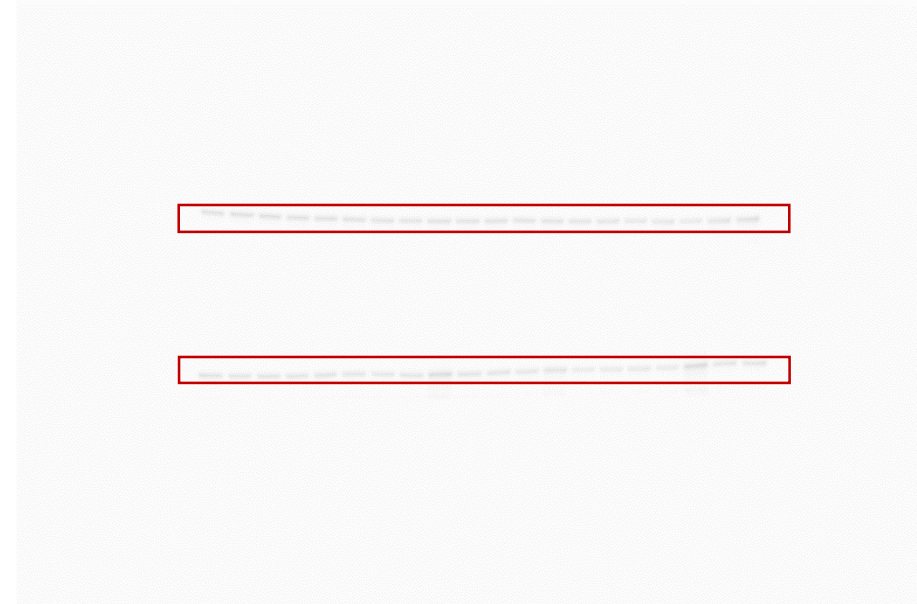

## MeCP2

### Frontal cortex (nuclear fraction)

membrane 1 and membrane 2

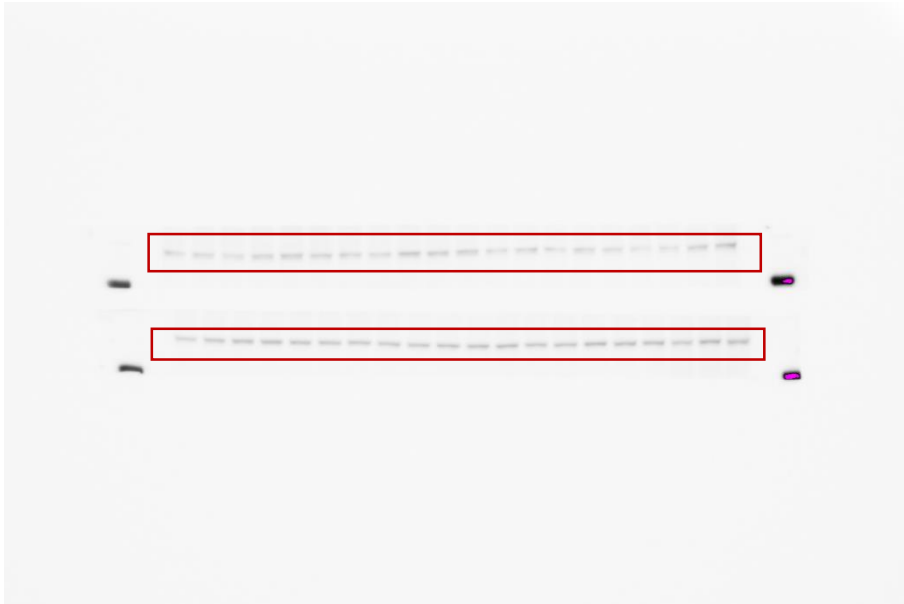

Samples from the left side - membrane 1:

*CTRL, DEX, CTRL + STRESS, DEX + STRESS, CTRL, DEX, CTRL + STRESS, DEX + STRESS.*

Samples from the left side - membrane 2:

*CTRL, DEX, CTRL + STRESS, DEX + STRESS, CTRL, DEX, CTRL + STRESS, DEX + STRESS.*

The results of the experiment are shown in Figure 10.

## $\beta$ -actin as loading control to MeCP2

### Frontal cortex (nuclear fraction)

membrane 1 and membrane 2

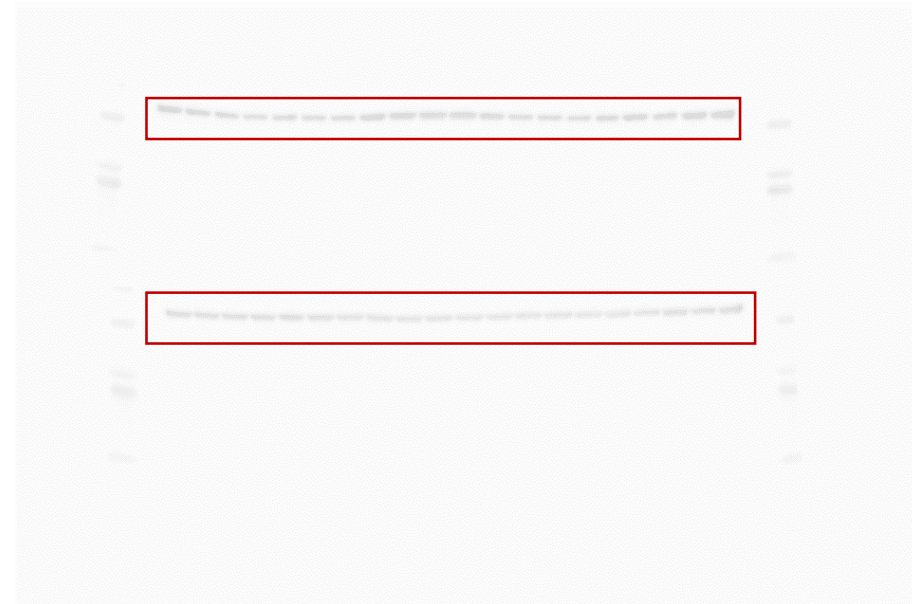

## MeCP2

### Hippocampus (nuclear fraction)

membrane 1 and membrane 2

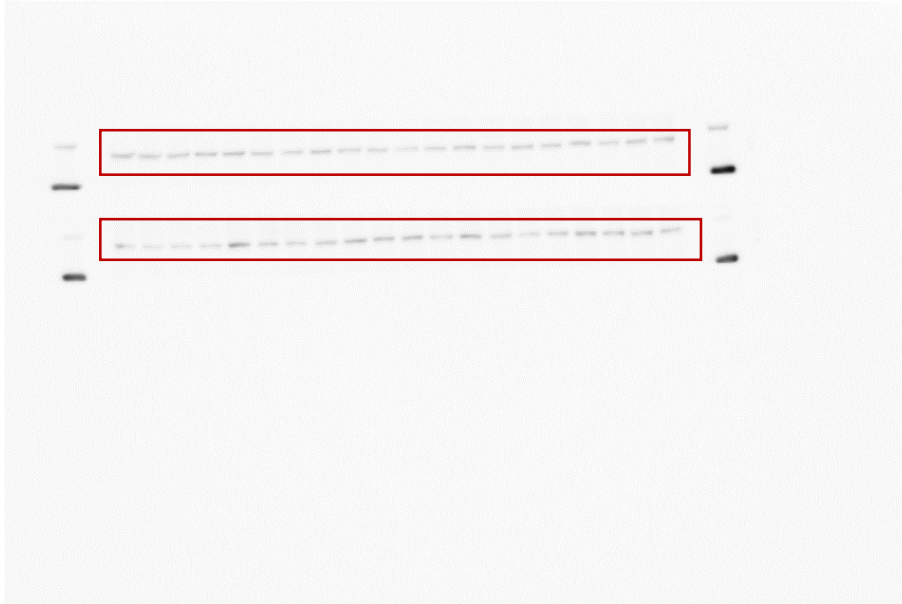

Samples from the left side - membrane 1:

*CTRL, DEX, CTRL + STRESS, DEX + STRESS, CTRL, DEX, CTRL + STRESS, DEX + STRESS, CTRL, DEX, CTRL + STRESS, DEX + STRESS, CTRL, DEX, CTRL + STRESS, DEX + STRESS*

Samples from the left side - membrane 2:

*CTRL, DEX, CTRL + STRESS, DEX + STRESS, CTRL, DEX, CTRL + STRESS, DEX + STRESS, CTRL, DEX, CTRL + STRESS, DEX + STRESS, CTRL, DEX, CTRL + STRESS, DEX + STRESS*

The results of the experiment are shown in Figure 10.

## $\beta$ -actin as loading control to MeCP2

### Hippocampus (nuclear fraction)

membrane 1 and membrane 2

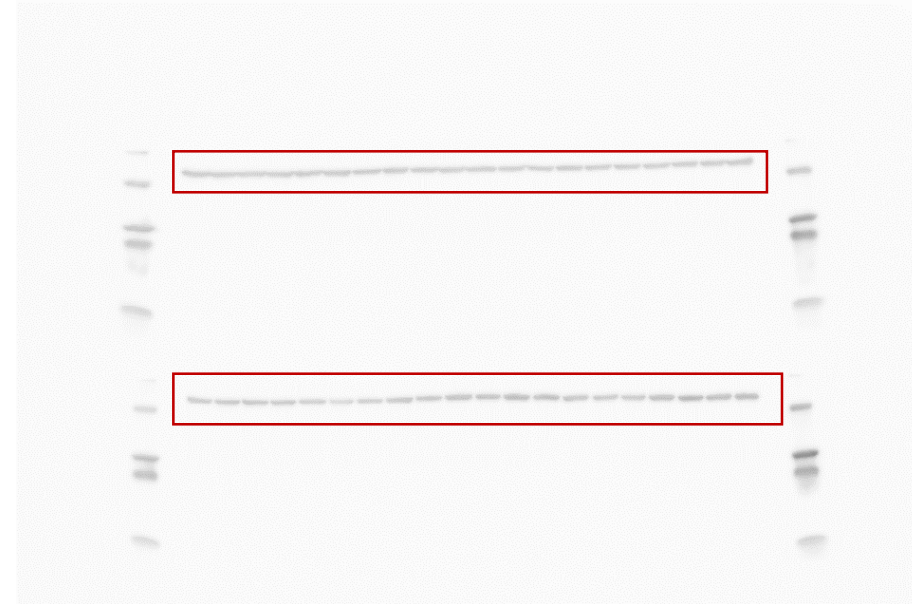

## HDAC5

### Frontal cortex (nuclear fraction)

membrane 1 and membrane 2

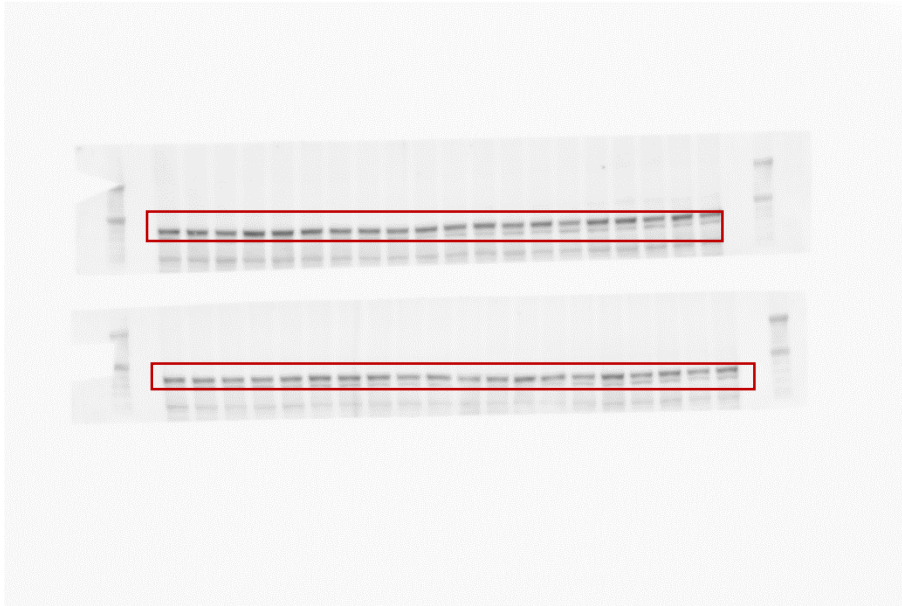

Samples from the left side - membrane 1:

*CTRL, DEX, CTRL + STRESS, DEX + STRESS, CTRL, DEX, CTRL + STRESS, DEX + STRESS.*

Samples from the left side - membrane 2:

*CTRL, DEX, CTRL + STRESS, DEX + STRESS, CTRL, DEX, CTRL + STRESS, DEX + STRESS.*

The results of the experiment are shown in Figure 10.

## $\beta$ -actin as loading control to HDAC5

### Frontal cortex (nuclear fraction)

membrane 1 and membrane 2

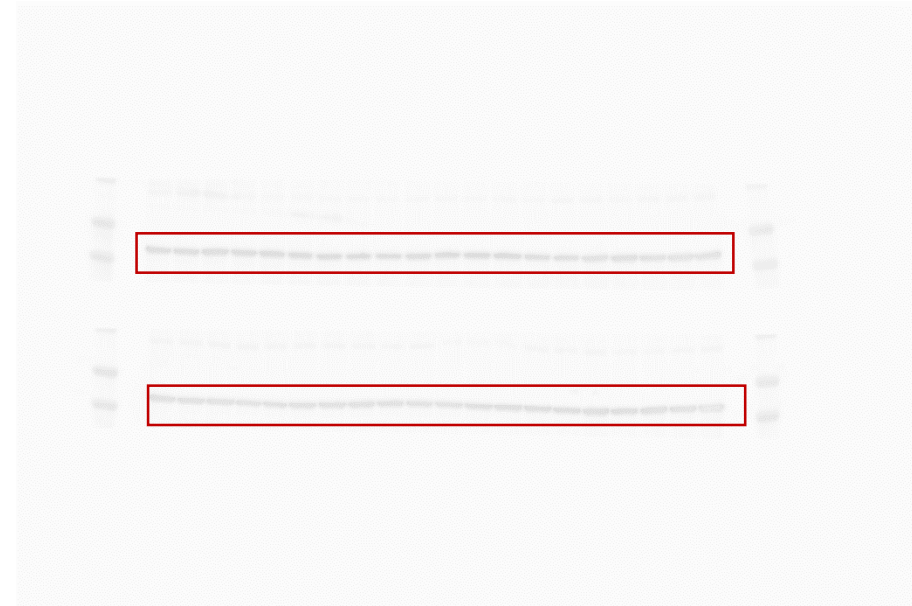

## HDAC5

### Hippocampus (nuclear fraction)

membrane 1 and membrane 2

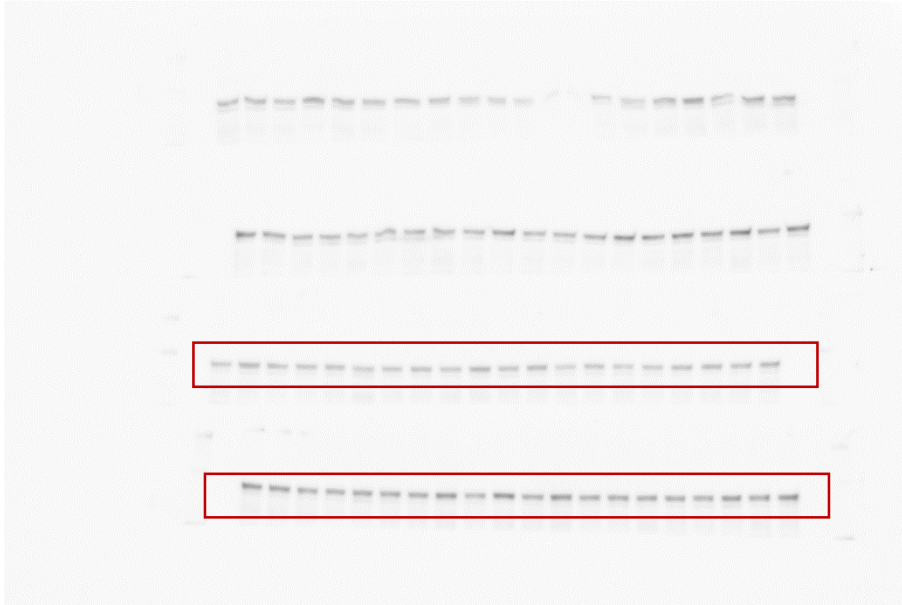

Samples from the left side - membrane 1:

*CTRL, DEX, CTRL + STRESS, DEX + STRESS, CTRL, DEX, CTRL + STRESS, DEX + STRESS.*

Samples from the left side - membrane 2:

*CTRL, DEX, CTRL + STRESS, DEX + STRESS, CTRL, DEX, CTRL + STRESS, DEX + STRESS.*

The results of the experiment are shown in Figure 10.

## $\beta$ -actin as loading control to HDAC5

### Hippocampus (nuclear fraction)

membrane 1 and membrane 2

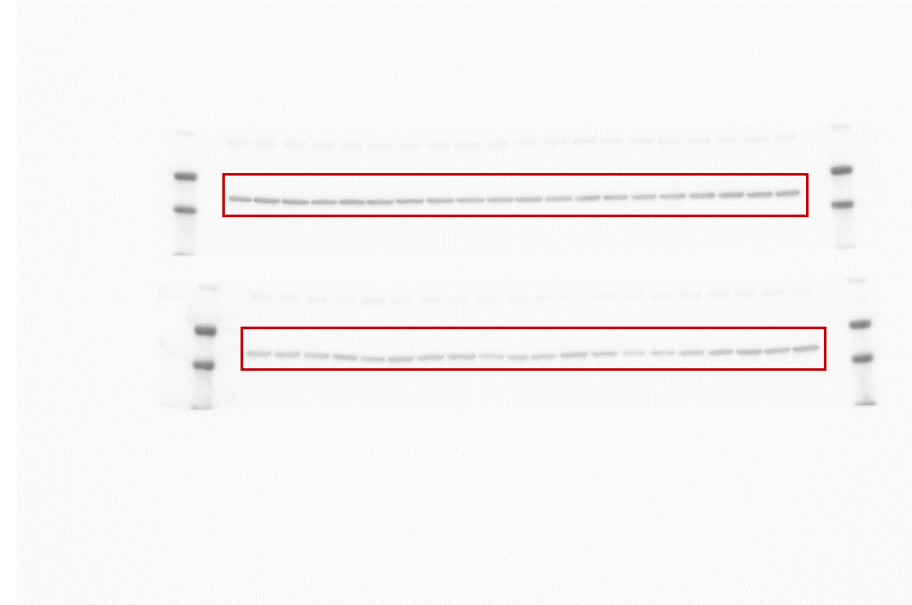

# HDAC1

## Frontal cortex (nuclear fraction)

membrane 1 and membrane 2

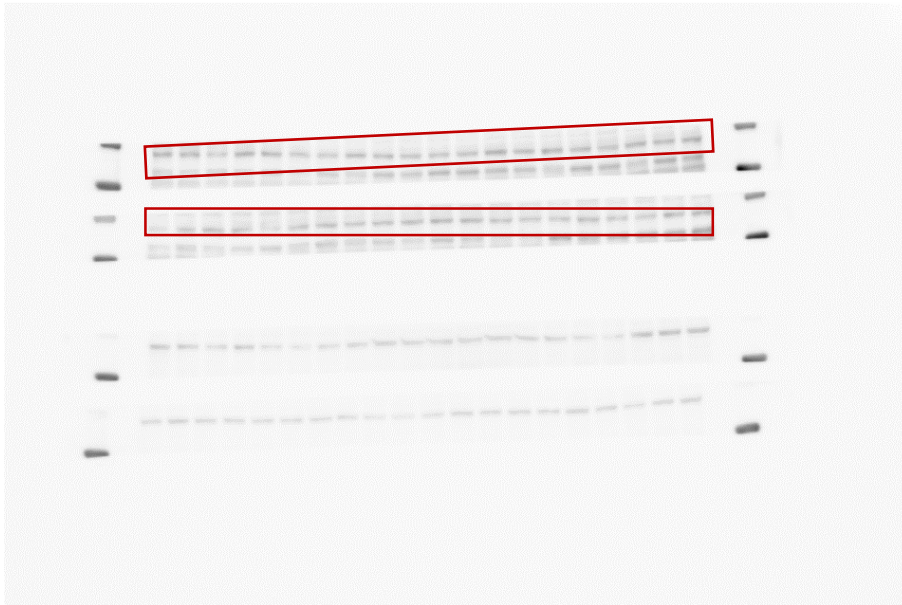

Samples from the left side - membrane 1:

*CTRL, DEX, CTRL + STRESS, DEX + STRESS, CTRL, DEX, CTRL + STRESS, DEX + STRESS, CTRL, DEX, CTRL + STRESS, DEX + STRESS, CTRL, DEX, CTRL + STRESS, DEX + STRESS.*

Samples from the left side - membrane 2:

*CTRL, DEX, CTRL + STRESS, DEX + STRESS, CTRL, DEX, CTRL + STRESS, DEX + STRESS, CTRL, DEX, CTRL + STRESS, DEX + STRESS, CTRL, DEX, CTRL + STRESS, DEX + STRESS.*

The results of the experiment are shown in Table 1.

# $\beta$ -actin as loading control to HDAC1

## Frontal cortex (nuclear fraction)

membrane 1 and membrane 2

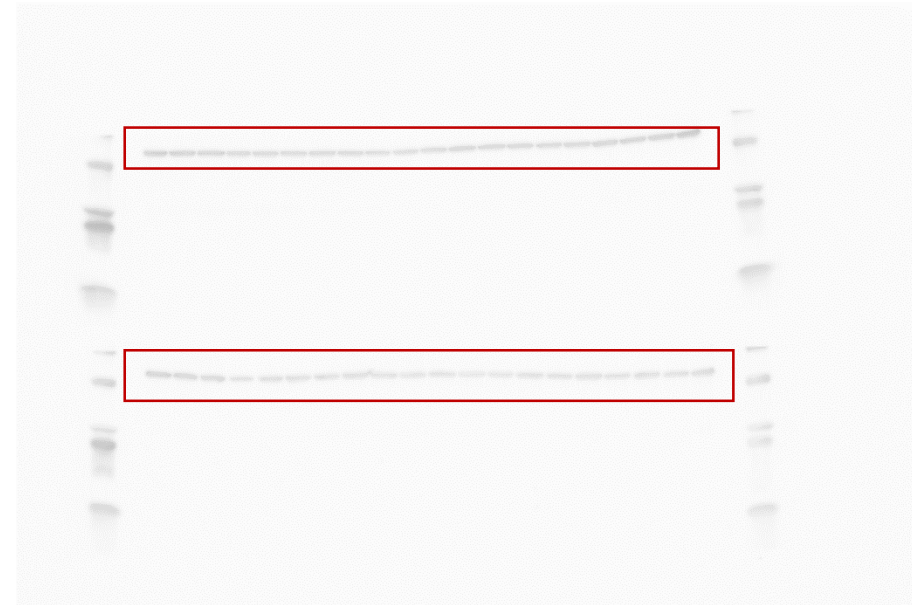

# HDAC1

## Hippocampus (nuclear fraction)

membrane 1 and membrane 2

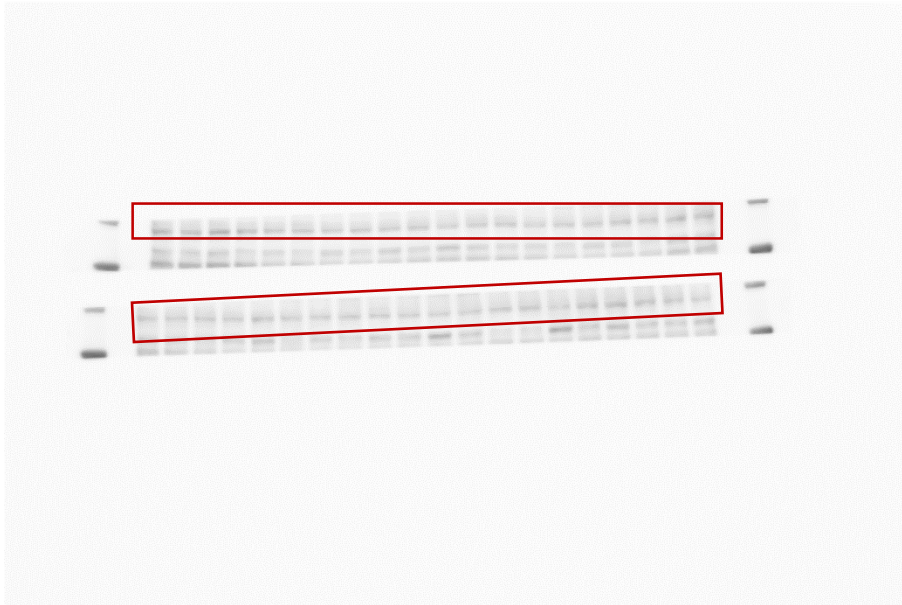

Samples from the left side - membrane 1:

*CTRL, DEX, CTRL + STRESS, DEX + STRESS, CTRL, DEX, CTRL + STRESS, DEX + STRESS.*

Samples from the left side - membrane 2:

*CTRL, DEX, CTRL + STRESS, DEX + STRESS, CTRL, DEX, CTRL + STRESS, DEX + STRESS.*

The results of the experiment are shown in Table 1.

# $\beta$ -actin as loading control to HDAC1

## Hippocampus (nuclear fraction)

membrane 1 and membrane 2

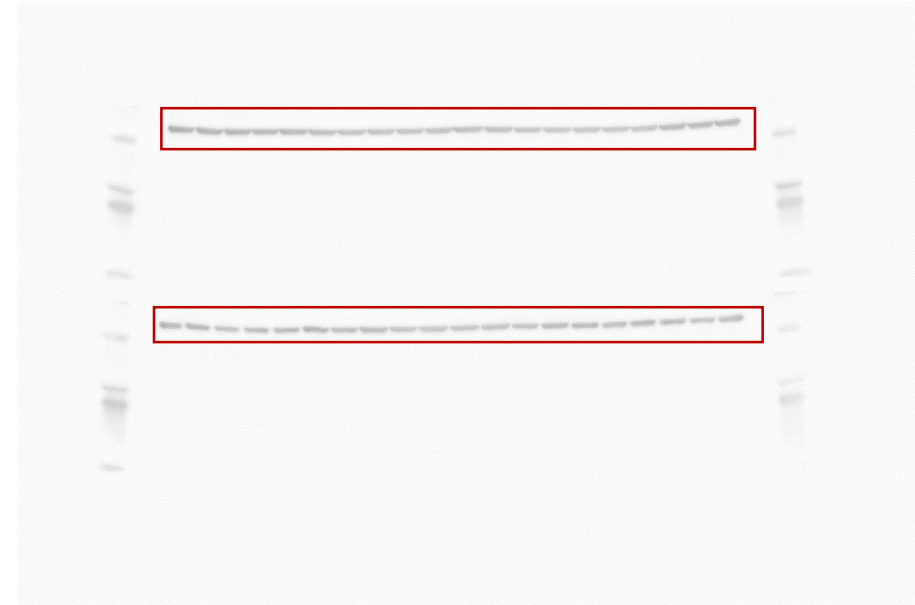

## HDAC2

### Frontal cortex (nuclear fraction)

membrane 1 and membrane 2

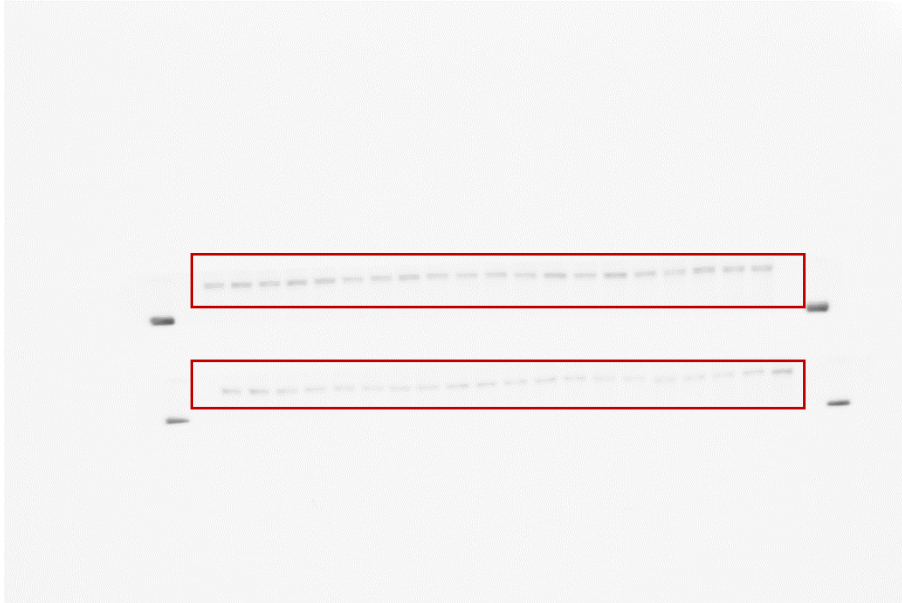

Samples from the left side - membrane 1:

*CTRL, DEX, CTRL + STRESS, DEX + STRESS, CTRL, DEX, CTRL + STRESS, DEX + STRESS, CTRL, DEX, CTRL + STRESS, DEX + STRESS, CTRL, DEX, CTRL + STRESS, DEX + STRESS.*

Samples from the left side - membrane 2:

*CTRL, DEX, CTRL + STRESS, DEX + STRESS, CTRL, DEX, CTRL + STRESS, DEX + STRESS, CTRL, DEX, CTRL + STRESS, DEX + STRESS, CTRL, DEX, CTRL + STRESS, DEX + STRESS.*

The results of the experiment are shown in Table 1.

## $\beta$ -actin as loading control to HDAC2

### Frontal cortex (nuclear fraction)

membrane 1 and membrane 2

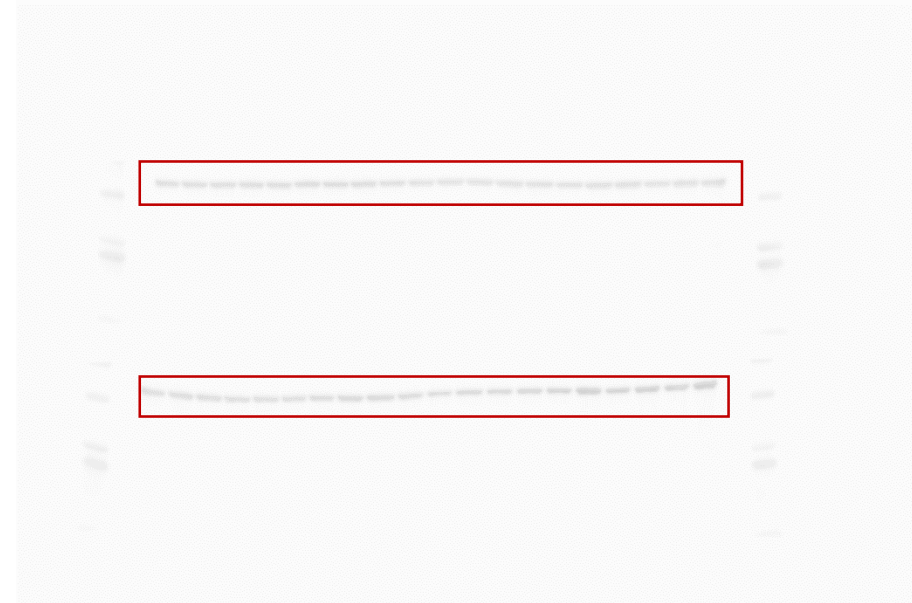



## HDAC2

### Hippocampus (nuclear fraction)

membrane 1 and membrane 2

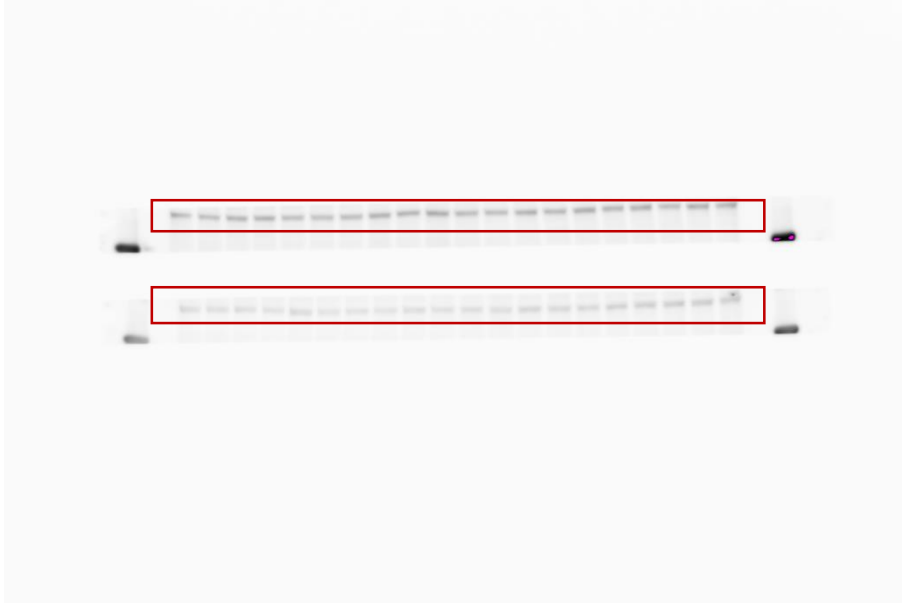

Samples from the left side - membrane 1:

*CTRL, DEX, CTRL + STRESS, DEX + STRESS, CTRL, DEX, CTRL + STRESS, DEX + STRESS, CTRL, DEX, CTRL + STRESS, DEX + STRESS, CTRL, DEX, CTRL + STRESS, DEX + STRESS.*

Samples from the left side - membrane 2:

*CTRL, DEX, CTRL + STRESS, DEX + STRESS, CTRL, DEX, CTRL + STRESS, DEX + STRESS, CTRL, DEX, CTRL + STRESS, DEX + STRESS, CTRL, DEX, CTRL + STRESS, DEX + STRESS.*

The results of the experiment are shown in Table 1.

## $\beta$ -actin as loading control to HDAC2

### Hippocampus (nuclear fraction)

membrane 1 and membrane 2

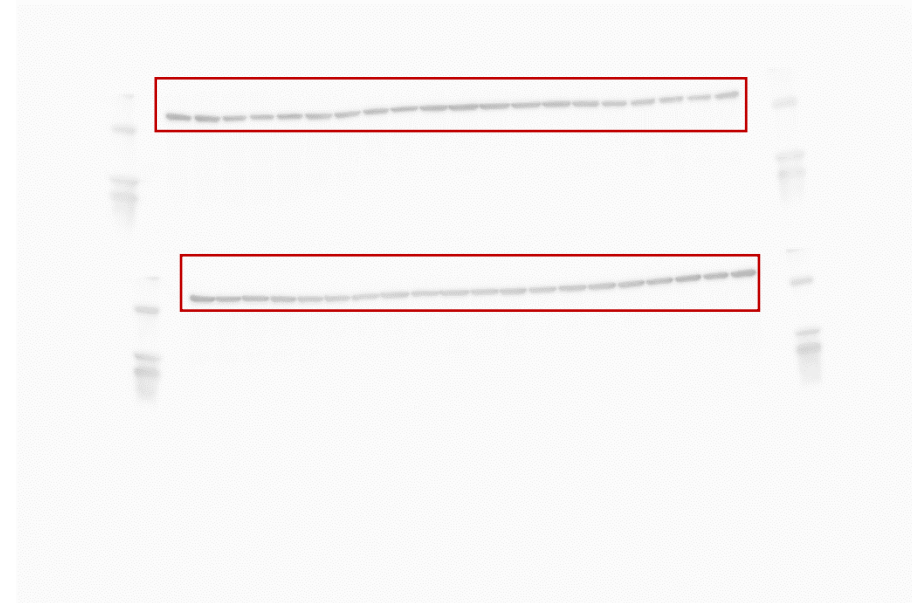

## HDAC4

### Frontal cortex (nuclear fraction)

membrane 1 and membrane 2

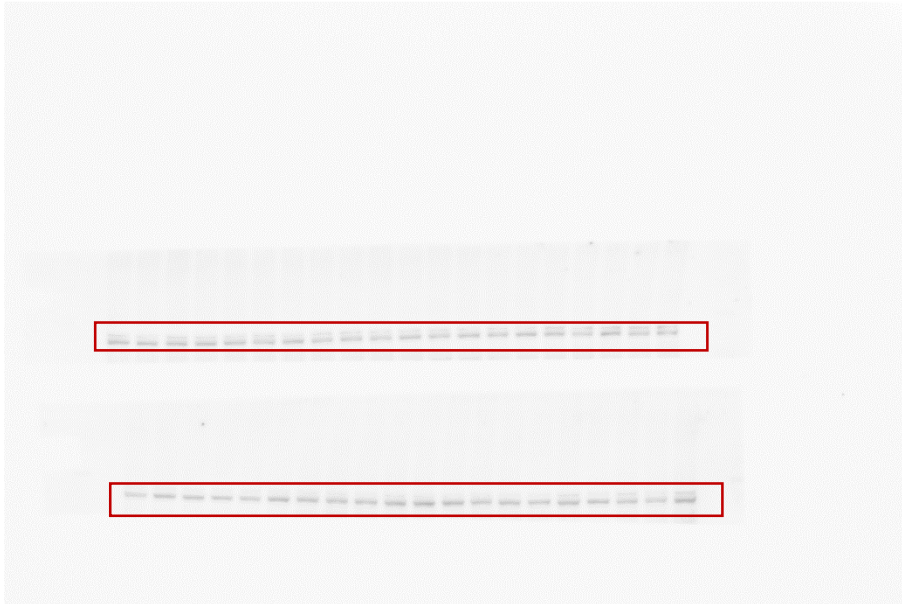

Samples from the left side - membrane 1:

*CTRL, DEX, CTRL + STRESS, DEX + STRESS, CTRL, DEX, CTRL + STRESS, DEX + STRESS, CTRL, DEX, CTRL + STRESS, DEX + STRESS, CTRL, DEX, CTRL + STRESS, DEX + STRESS.*

Samples from the left side - membrane 2:

*CTRL, DEX, CTRL + STRESS, DEX + STRESS, CTRL, DEX, CTRL + STRESS, DEX + STRESS, CTRL, DEX, CTRL + STRESS, DEX + STRESS, CTRL, DEX, CTRL + STRESS, DEX + STRESS.*

The results of the experiment are shown in Table 1.

## $\beta$ -actin as loading control to HDAC4

### Frontal cortex (nuclear fraction)

membrane 1 and membrane 2

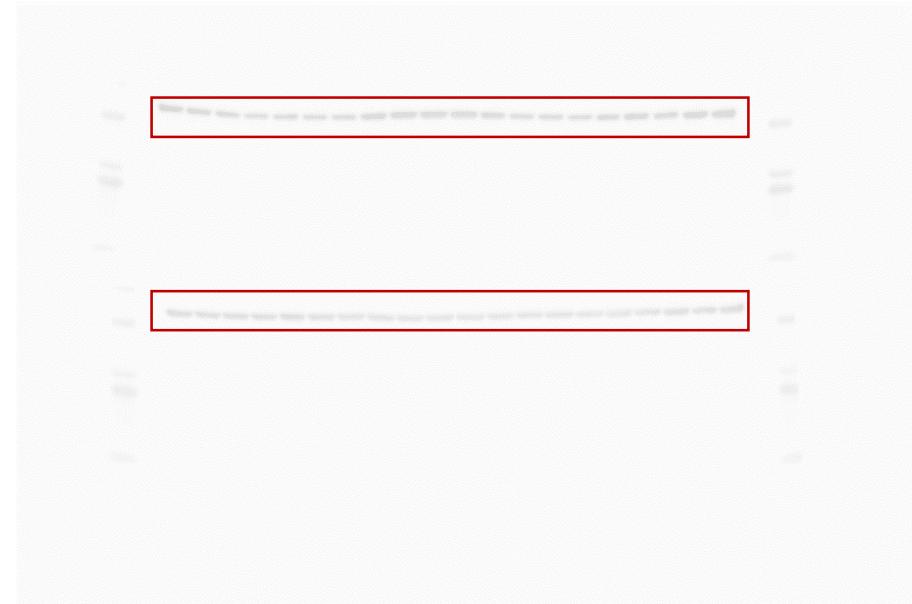

## HDAC4

### Hippocampus (nuclear fraction)

membrane 1 and membrane 2

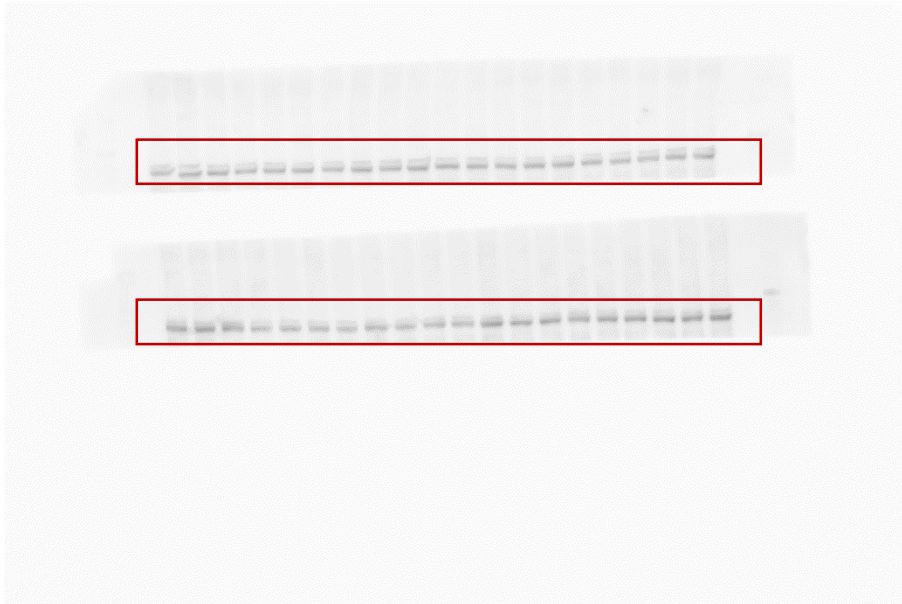

Samples from the left side - membrane 1:

*CTRL, DEX, CTRL + STRESS, DEX + STRESS, CTRL, DEX, CTRL + STRESS, DEX + STRESS.*

Samples from the left side - membrane 2:

*CTRL, DEX, CTRL + STRESS, DEX + STRESS, CTRL, DEX, CTRL + STRESS, DEX + STRESS.*

The results of the experiment are shown in Table 1.

## $\beta$ -actin as loading control to HDAC4

### Hippocampus (nuclear fraction)

membrane 1 and membrane 2

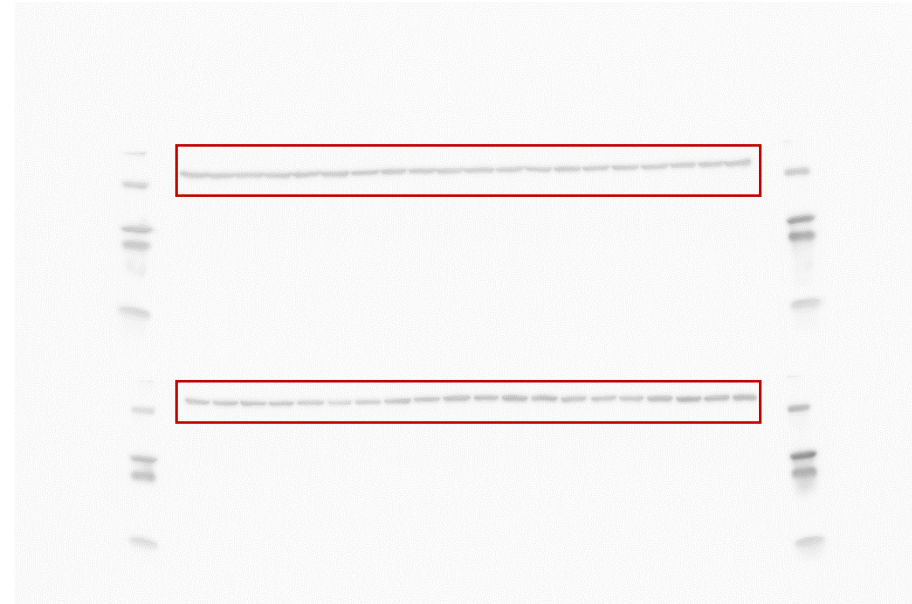

## Dnmt1

### Frontal cortex (nuclear fraction)

membrane 1 and membrane 2

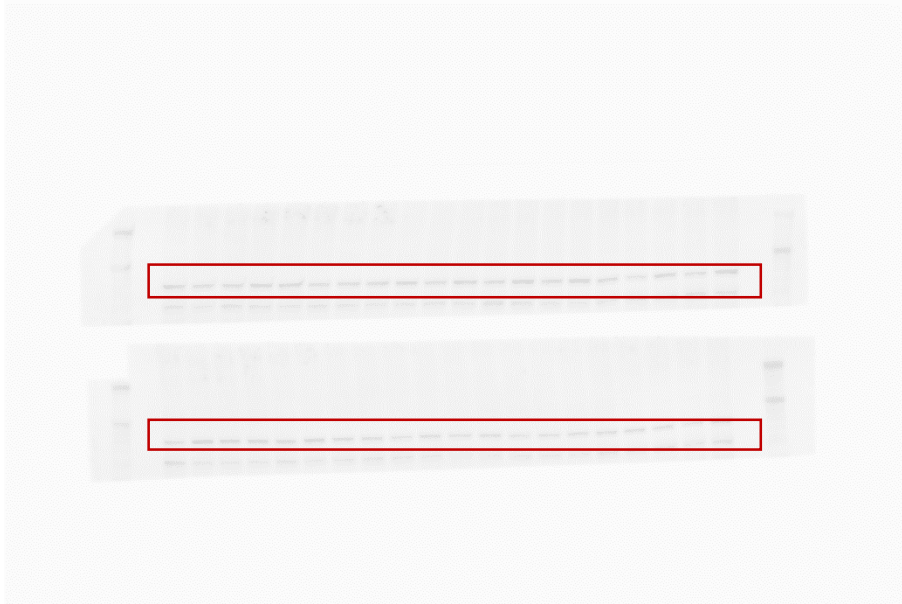

Samples from the left side - membrane 1:

*CTRL, DEX, CTRL + STRESS, DEX + STRESS, CTRL, DEX, CTRL + STRESS, DEX + STRESS, CTRL, DEX, CTRL + STRESS, DEX + STRESS, CTRL, DEX, CTRL + STRESS, DEX + STRESS.*

Samples from the left side - membrane 2:

*CTRL, DEX, CTRL + STRESS, DEX + STRESS, CTRL, DEX, CTRL + STRESS, DEX + STRESS, CTRL, DEX, CTRL + STRESS, DEX + STRESS, CTRL, DEX, CTRL + STRESS, DEX + STRESS.*

The results of the experiment are shown in Table 1.

## $\beta$ -actin as loading control to Dnmt1

### Frontal cortex (nuclear fraction)

membrane 1 and membrane 2

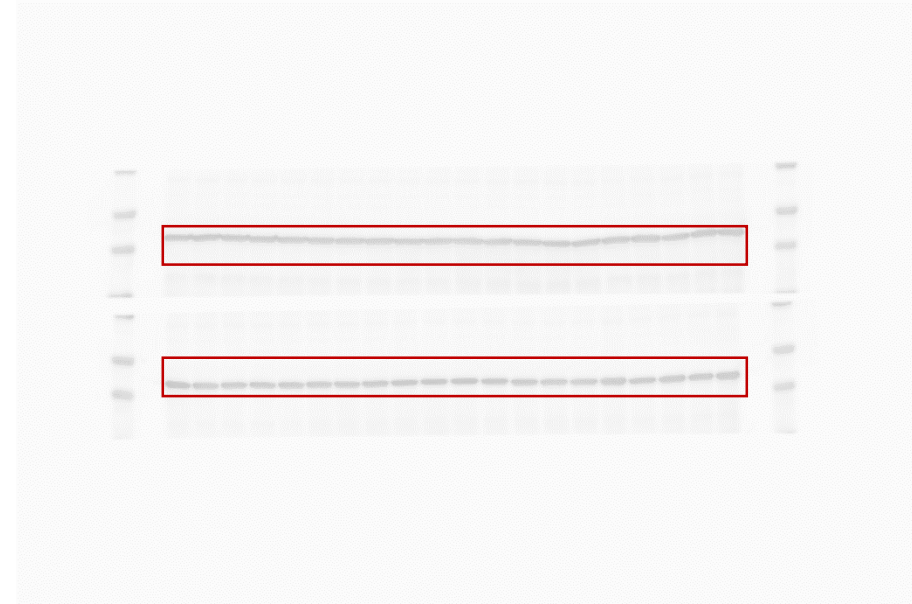

## Dnmt1

### Hippocampus (nuclear fraction)

membrane 1 and membrane 2

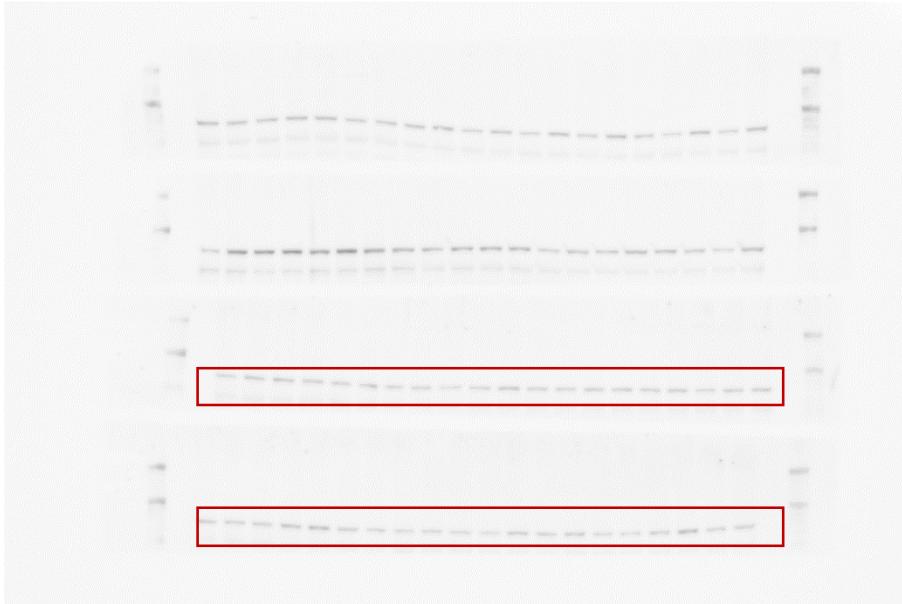

Samples from the left side - membrane 1:

*CTRL, DEX, CTRL + STRESS, DEX + STRESS, CTRL, DEX, CTRL + STRESS, DEX + STRESS.*

Samples from the left side - membrane 2:

*CTRL, DEX, CTRL + STRESS, DEX + STRESS, CTRL, DEX, CTRL + STRESS, DEX + STRESS.*

The results of the experiment are shown in Table 1.

## $\beta$ -actin as loading control to Dnmt1

### Hippocampus (nuclear fraction)

membrane 1 and membrane 2

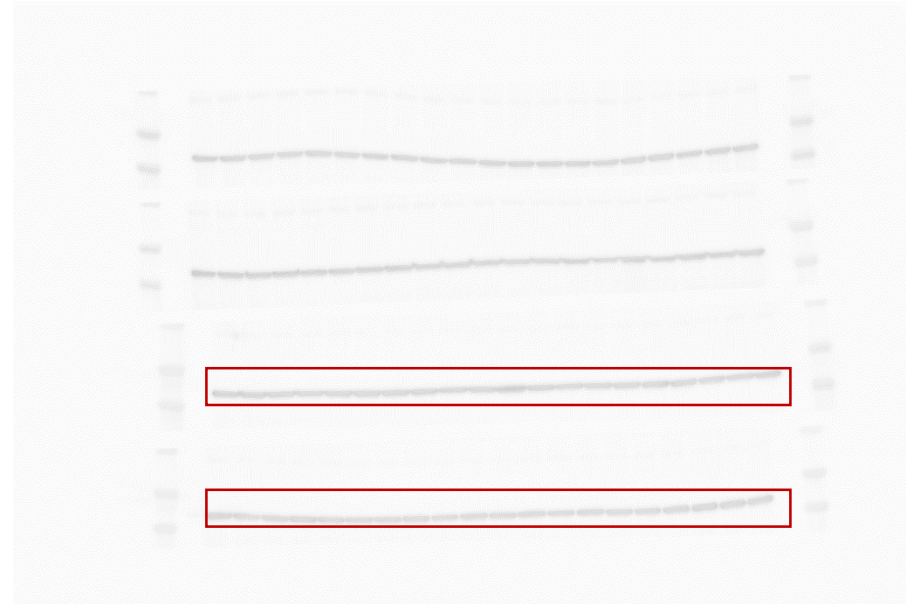

## Dnmt3a

### Frontal cortex (nuclear fraction)

membrane 1 and membrane 2

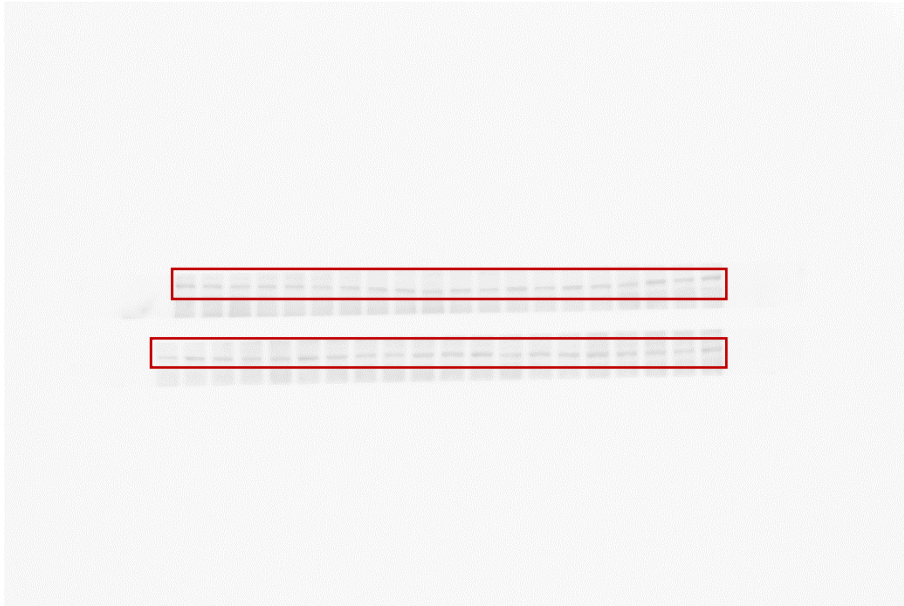

Samples from the left side - membrane 1:

*CTRL, DEX, CTRL + STRESS, DEX + STRESS, CTRL, DEX, CTRL + STRESS, DEX + STRESS.*

Samples from the left side - membrane 2:

*CTRL, DEX, CTRL + STRESS, DEX + STRESS, CTRL, DEX, CTRL + STRESS, DEX + STRESS.*

The results of the experiment are shown in Table 1.

## $\beta$ -actin as loading control to Dnmt3a

### Frontal cortex (nuclear fraction)

membrane 1 and membrane 2

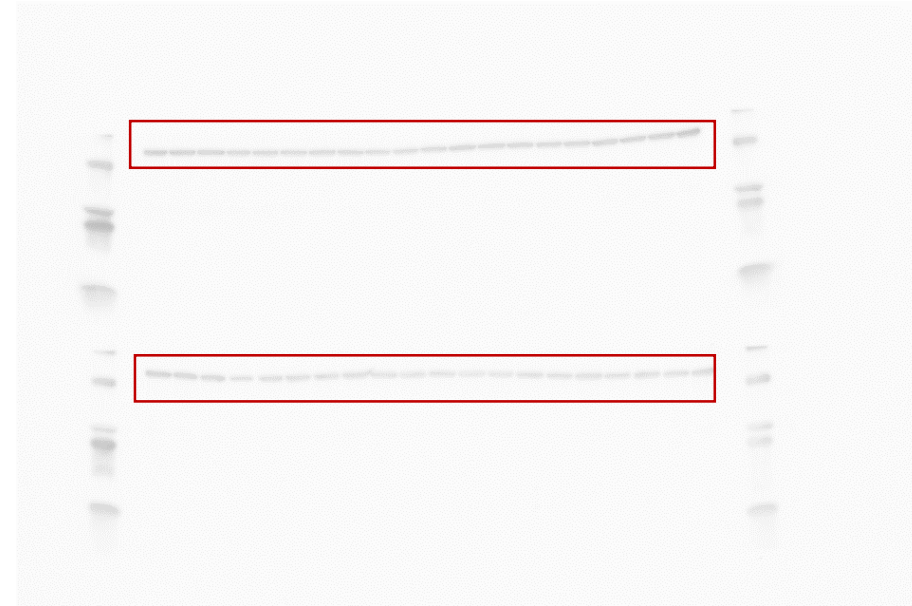

## Dnmt3a

### Hippocampus (nuclear fraction)

membrane 1 and membrane 2

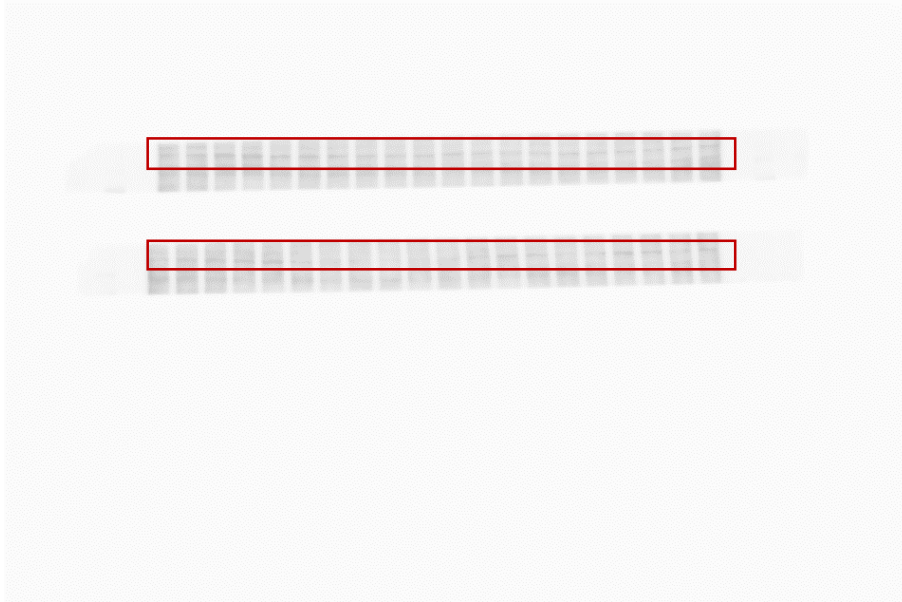

Samples from the left side - membrane 1:

*CTRL, DEX, CTRL + STRESS, DEX + STRESS, CTRL, DEX, CTRL + STRESS, DEX + STRESS, CTRL, DEX, CTRL + STRESS, DEX + STRESS, CTRL, DEX, CTRL + STRESS, DEX + STRESS.*

Samples from the left side - membrane 2:

*CTRL, DEX, CTRL + STRESS, DEX + STRESS, CTRL, DEX, CTRL + STRESS, DEX + STRESS, CTRL, DEX, CTRL + STRESS, DEX + STRESS, CTRL, DEX, CTRL + STRESS, DEX + STRESS.*

The results of the experiment are shown in Table 1.

## $\beta$ -actin as loading control to Dnmt3a

### Hippocampus (nuclear fraction)

membrane 1 and membrane 2

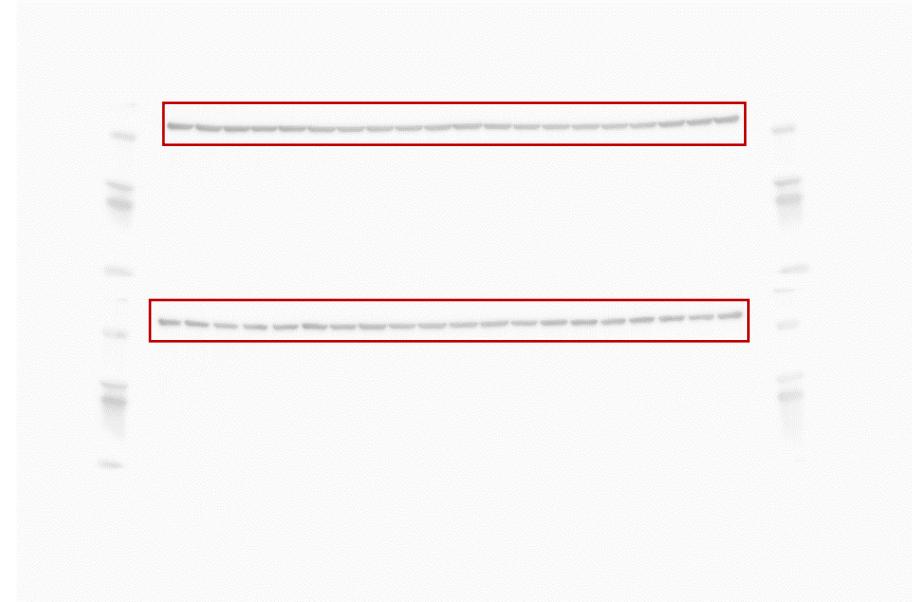

## Dnmt3b

### Frontal cortex (nuclear fraction)

membrane 1 and membrane 2

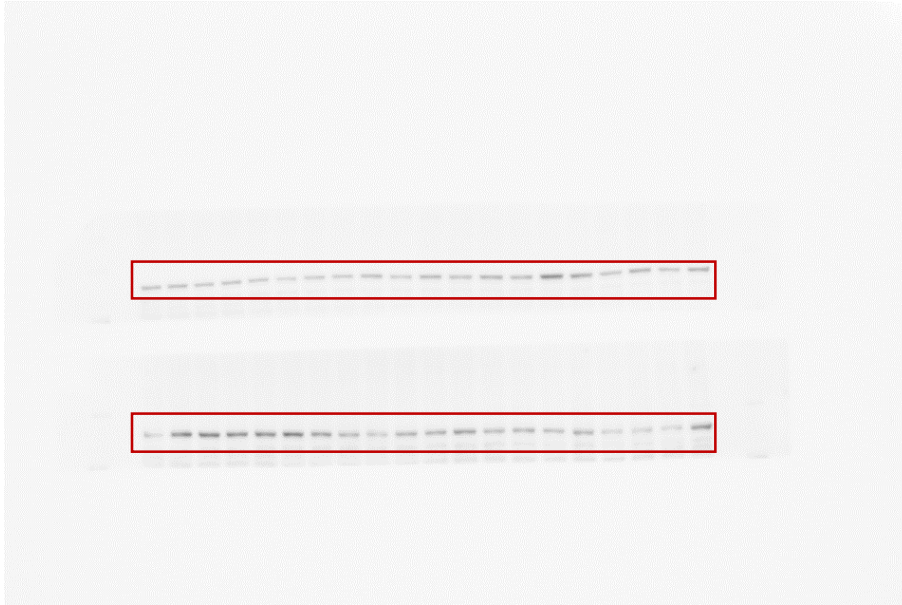

Samples from the left side - membrane 1:

*CTRL, DEX, CTRL + STRESS, DEX + STRESS, CTRL, DEX, CTRL + STRESS, DEX + STRESS.*

Samples from the left side - membrane 2:

*CTRL, DEX, CTRL + STRESS, DEX + STRESS, CTRL, DEX, CTRL + STRESS, DEX + STRESS.*

The results of the experiment are shown in Table 1.

## $\beta$ -actin as loading control to Dnmt3b

### Frontal cortex (nuclear fraction)

membrane 1 and membrane 2

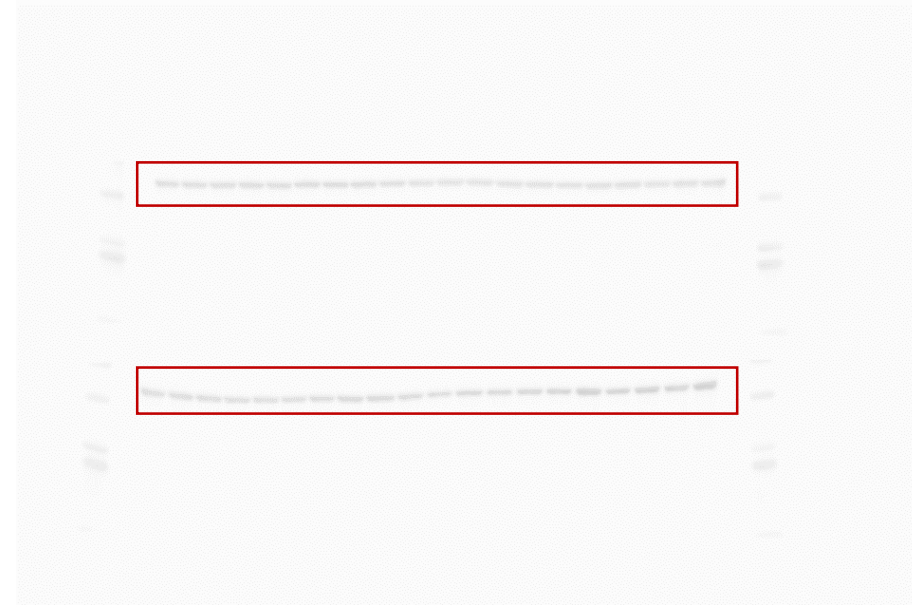



## Dnmt3b

### Hippocampus (nuclear fraction)

membrane 1 and membrane 2

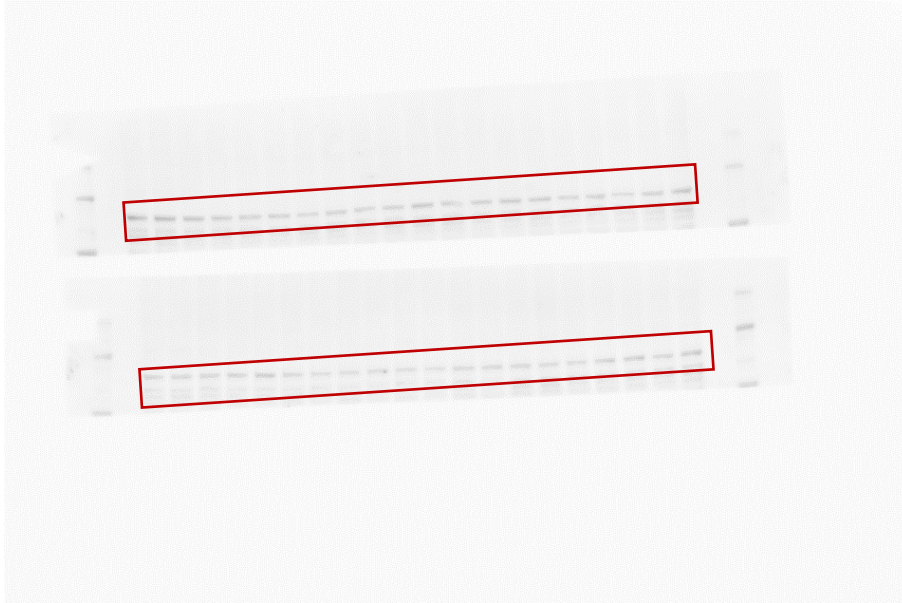

Samples from the left side - membrane 1:

*CTRL, DEX, CTRL + STRESS, DEX + STRESS, CTRL, DEX, CTRL + STRESS, DEX + STRESS, CTRL, DEX, CTRL + STRESS, DEX + STRESS, CTRL, DEX, CTRL + STRESS, DEX + STRESS.*

Samples from the left side - membrane 2:

*CTRL, DEX, CTRL + STRESS, DEX + STRESS, CTRL, DEX, CTRL + STRESS, DEX + STRESS, CTRL, DEX, CTRL + STRESS, DEX + STRESS, CTRL, DEX, CTRL + STRESS, DEX + STRESS.*

The results of the experiment are shown in Table 1.

## $\beta$ -actin as loading control to Dnmt3b

### Hippocampus (nuclear fraction)

membrane 1 and membrane 2

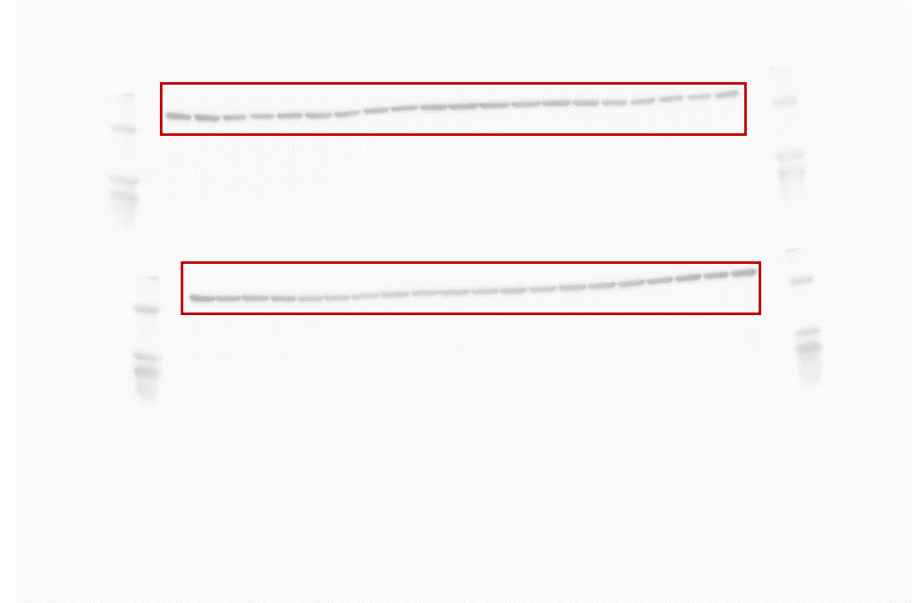

Not all WB samples (presented on pages 2-33) were analyzed (poor quality or outliers were not analyzed).
